# Supplementary material
Source: PubMed Central journal article supplement (PMC3740847)
Supplement: 1221950110_sapp.pdf [file 1221950110_sapp.pdf]

## ***Supporting Information (SI) Appendix for***

### ***Six-rowed spike4 (Vrs4) controls spikelet determinacy and row-type in barley***

Ravi Koppolu<sup>a,1</sup>, Nadia Anwar<sup>b,1</sup>, Shun Sakuma<sup>b</sup>, Akemi Tagiri<sup>b</sup>, Udda Lundqvist<sup>c</sup>, Mohammad Pourkheirandish<sup>b</sup>, Twan Rutten<sup>d</sup>, Christiane Seiler<sup>e</sup>, Axel Himmelbach<sup>a</sup>, Ruvini Ariyadasa<sup>a</sup>, Helmy Mohamad Youssef<sup>a,f</sup>, Nils Stein<sup>a</sup>, Nese Sreenivasulu<sup>e,g,h</sup>, Takao Komatsuda<sup>b</sup> and Thorsten Schnurbusch<sup>a,2</sup>

<sup>a</sup>Department of Genebank, Leibniz-Institute of Plant Genetics and Crop Plant Research (IPK), Gatersleben, D06466, <sup>b</sup>Plant Genome Research Unit, National Institute of Agrobiological Sciences (NIAS), Tsukuba, Japan, 3058602, <sup>c</sup>Nordic Genetic Resource Center, Alnarp, Sweden, SE-23053, <sup>d</sup>Department of Physiology and Cell Biology, Leibniz-Institute of Plant Genetics and Crop Plant Research (IPK), Gatersleben, D06466, <sup>e</sup>Department of Molecular Genetics, Leibniz-Institute of Plant Genetics and Crop Plant Research (IPK), Gatersleben, D06466, <sup>f</sup>Department of Plant Physiology, Faculty of Agriculture, Cairo University, Giza, Egypt, 12613, <sup>g</sup>Research Group Abiotic Stress Genomics, Interdisciplinary Center for Crop Plant Research (IZN), Halle (Saale) D06120, Germany; <sup>h</sup>Grain Quality and Nutrition Center, International Rice Research Institute (IRRI), Metro Manila 1301, Philippines; <sup>1</sup>These authors contributed equally to this work.

Corresponding author: [thor@ipk-gatersleben.de](mailto:thor@ipk-gatersleben.de)

Tel: +49 (0)39482 5-341

Fax: +49 (0)39482 5-595

## SI Text

### Characterization of deletion in MHOR 318 and MHOR 345.

Because the MHOR 318 and MHOR 345 mutants are X-ray induced and are not back-crossed to an isogenic background we characterized the extent of their deletions in the *Vrs4* region using primers derived from the syntenic gene sequences from *Brachypodium*. The synteny in the *Vrs4* region appears to be highly conserved between barley, *Brachypodium* and rice (main text, Fig. 3). The table below shows the list of *Brachypodium* orthologs of barley genes in the *Vrs4* region and their presence or absence in MHOR mutants.

| Brachy gene    | Annotation                                                                | MHOR 318 | MHOR 345 |
|----------------|---------------------------------------------------------------------------|----------|----------|
| Bradi2g04110.1 | proactivator polypeptide-like 1-like                                      | Intact   | Intact   |
| Bradi2g04117.1 | mini-chromosome maintenance complex-binding protein-like                  | Intact   | Intact   |
| Bradi2g04130.1 | uncharacterized membrane protein At1g06890-like                           | Intact   | Intact   |
| Bradi2g04140.1 | hypothetical protein                                                      | Intact   | Intact   |
| Bradi2g04150.1 | Putative expressed protein                                                | Intact   | Intact   |
| Bradi2g04160.1 | pentatricopeptide repeat-containing protein At5g66631-like                | Intact   | Intact   |
| Bradi2g04170.1 | Putative expressed protein                                                | Intact   | Intact   |
| Bradi2g04180.3 | Putative expressed protein                                                | Intact   | Intact   |
| Bradi2g04190.1 | Putative expressed protein                                                | Intact   | Intact   |
| Bradi2g04197.1 | zinc finger, C3HC4 type family protein                                    | Deleted  | Intact   |
| Bradi2g04210.1 | autophagy 18D-like protein                                                | Deleted  | Intact   |
| Bradi2g04220.1 | DUF246 domain-containing protein At1g04910-like                           | Deleted  | Intact   |
| Bradi2g04230.1 | catalytic/ hydrolase                                                      | Deleted  | Intact   |
| Bradi2g04240.1 | flavin-containing monooxygenase YUCCA10-like                              | *        | *        |
| Bradi2g04247.1 | flavin-containing monooxygenase YUCCA10-like                              | *        | *        |
| Bradi2g04257.1 | flavin-containing monooxygenase YUCCA10-like                              | *        | *        |
| Bradi2g04270.1 | ramosa2                                                                   | Deleted  | Deleted  |
| Bradi2g04280.1 | RST1                                                                      | Deleted  | Deleted  |
| Bradi2g04290.1 | tryptophan aminotransferase-related protein 2-like                        | Intact   | Intact   |
| Bradi2g04297.1 | Putative expressed protein                                                | Intact   | Intact   |
| Bradi2g04310.1 | galactinol--sucrose galactosyltransferase-like                            | Intact   | Intact   |
| Bradi2g04317.1 | D111/G-patch domain-containing protein                                    | Intact   | Intact   |
| Bradi2g04330.1 | probable LRR receptor-like serine/threonine-protein kinase At4g26540-like | Intact   | Intact   |

\*Indicates non-syntenic genes in barley. A nucleotide BLAST search against gene rich survey sequences from Morex, Barke and Bowman deposited in IPK barley BLAST server indicated that the orthologous barley genes of *Brachypodium YUCCA10-like* are located somewhere else in the barley genome (Bradi2g04240.1 & Bradi2g04257.1 on chromosomes 2HL and Bradi2g04247.1 on 1H).

Grey highlighted genes are present in the sequenced BAC contig (main text, Fig. 3)

In MHOR 318 the deletion is comparatively larger than in MHOR 345. In both MHOR mutants *HvRA2* and *RESURRECTION1 (RST1)* were commonly deleted. *RST1* has a putative function in lipid synthesis and embryo development (1).

### qRT PCR in *vrs4* mutants BW-NIL(*vrs4.k*), MHOR 318 and MHOR 345.

Expression analysis of *HvRA2* showed lower transcript abundance in BW-NIL(*vrs4.k*) (frame shift mutation) compared to its progenitor MFB104, whereas MHOR 318 and MHOR 345 (deletion

mutants) showed complete absence of *HvRA2* transcripts compared to their progenitors Ackermann's Donaria and Heine's Haisa, respectively (Figure below).

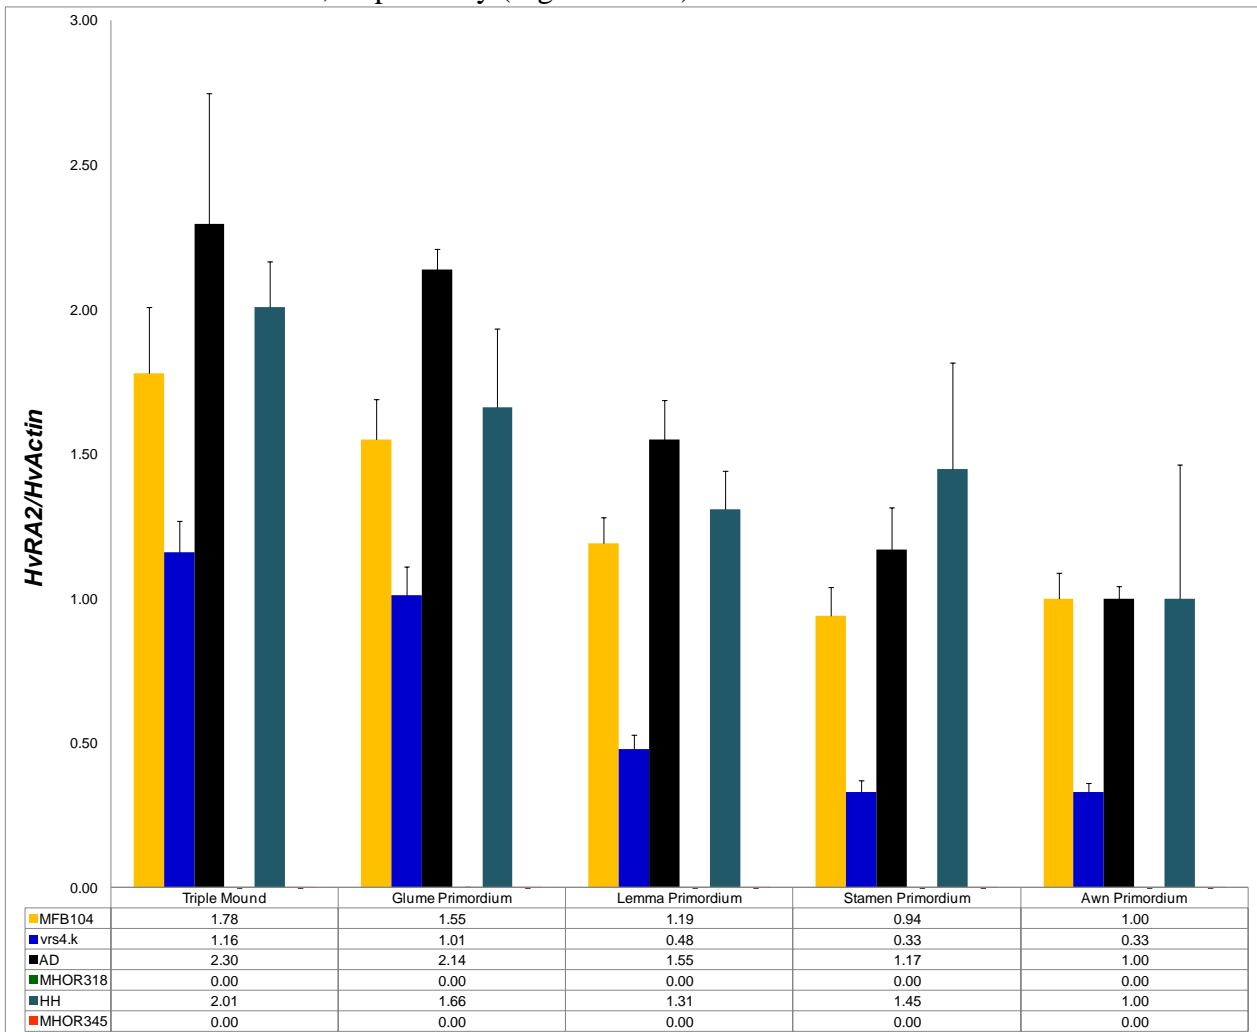

Relative expression of *HvRA2* in BW-NIL(*vrs4.k*), MHOR 318 and MHOR 345 compared to their progenitors. Values in the table below the graph indicate expression of *HvRA2* in wild-types and respective *vrs4* mutants. Error bars indicate mean±S.E. of three replicates.

#### Allelism test for *int-e.4* and *int-e.20*.

Because the *int-e.4* and *int-e.20* mutant alleles of *vrs4* did not show any molecular lesion within the *HvRA2* ORF the allelism test data is presented below which confirms that these two mutants are in fact allelic to *vrs4* locus. The *int-e.4* and *int-e.20* were crossed to *vrs4.m* and the phenotypes were recorded for F<sub>1</sub> and F<sub>2</sub> stages.

Crossing analyses were done at Svalöv 1989 – 1990.

F<sub>1</sub> : *vrs4.m* × *int-e.4* – *Intermedium* types

F<sub>2</sub>: *vrs4.m* × *int-e.4* – 22 *vrs4.m*: 26 *int-e.4*: 61 *Intermedium* types stronger than *int-e.4* but not so pronounced than *vrs4.m*

F<sub>1</sub> : *vrs4.m* × *int-e.20* – *Intermedium* types

F<sub>2</sub>: *vrs4.m* × *int-e.20* – 48 *vrs4.m*: 34 *int-e.20*: 68 *Intermedium* types stronger than *int-e.20* but not so pronounced than *vrs4.m*

### Additional phenotypic descriptions for *vrs4* mutants.

In wild-type *Vrs4* inflorescence, each spikelet meristem (SM) produces a pair of glumes (inner and outer glumes) (Fig. S1A,D,F). The *vrs4* mutants showed defects in glume development (Fig. S1C,G) (*SI Dataset S1A*), including the occasional absence or rudimentary formation of one or both the glumes and failure in separation of inner and outer glumes (Fig. S2G). In some cases the glumes became indeterminate with more than two per spikelet (Fig. S2F) and also the glumes were modified to produce additional spikelets/florets (Fig. S2G). Additional lemma-like structures with partially or completely developed awns were also observed in both the central (Figure below (B), Fig. S1H) and lateral spikelets. In case of BW-NIL(*vrs4.k*) and BW-NIL(*mul1.a*) spikelets were pedicelled compared to sessile spikelets of their wild-types (Figure below (A)) (2). Another notable phenotype observed in BW-NIL(*vrs4.k*) and BW-NIL(*mul1.a*) was the prostrate growth of tillers compared to erect growth in wild-type Bowman (Figure below (C)).

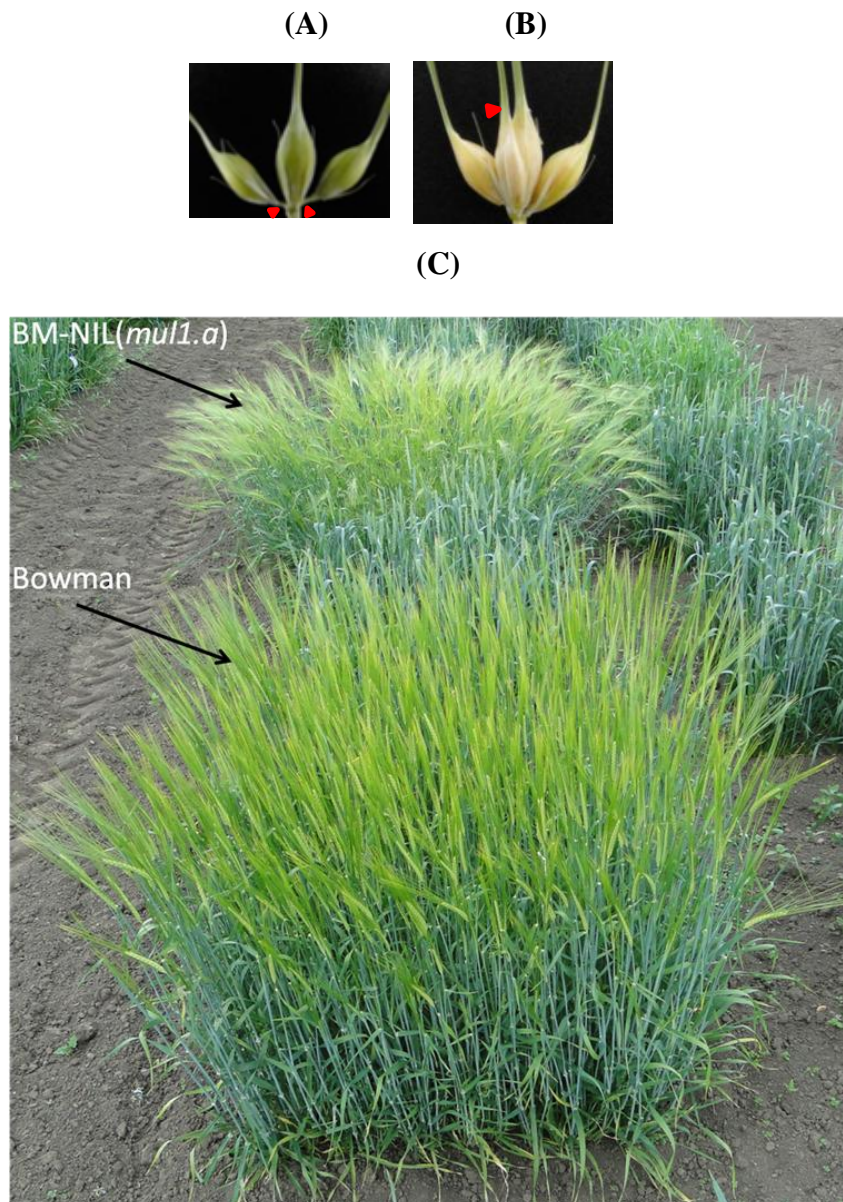

### **Differentially regulated genes in microarray analysis.**

Based on the 60K microarray analysis in two *vrs4* deletion mutants MHOR 345 (wild-type-Heine's Haisa) and MHOR 318 (wild-type-Ackermann's Donaria) at glume, stamen and awn primordium stages we identified 752 genes that showed robust expression changes with a fold change of >2 at an adjusted *P*-value of <0.05. Among them, 337 genes were down-regulated and 415 genes were up-regulated in the mutants at two or more developmental stages. For the hierarchical clustering analysis shown in *SI Dataset S1D*, all 36 arrays were pre-processed and quantile normalized, the co-expression relationships were calculated using Spearman correlation test and complete linkage algorithm implemented in Genespring 12.0. Interestingly, more than 70% of the differentially regulated gene sets are reproduced in the two deletion mutants (*SI Dataset S1D* and *S1F*) and the remaining 30% of the changes seen mainly in MHOR 318 could be related to higher extent of deletion beyond *Vrs4*. The genes encoding C3HC4 zinc finger, AUTOPHAGY18D-LIKE in MHOR 318 and RST1 in MHOR 318 and MHOR 345 were highly down-regulated compared to their wild-type counterparts. The down-regulation of these genes is most likely due to the deletion of these genes in the respective MHOR mutants.

## **SI Materials and Methods**

### **Genetic mapping.**

Two F<sub>2</sub> mapping populations were generated by crossing mutant parent *vrs4.k* with two-rowed parents Golden Promise (*vrs4.k* × Golden Promise) and Barke (Barke × *vrs4.k*) at IPK, Germany and another three F<sub>2</sub> mapping populations were generated by crossing two-rowed parent OUH602 (*Hordeum vulgare* ssp. *spontaneum*) with mutant parents *Xc 41.5* (syn. *vrs4.l*) (*Xc 41.5* × OUH602), *int-e.23* (*int-e.23* × OUH602) and *int-e.128* (*int-e.128* × OUH602) at NIAS, Japan. F<sub>2</sub> genotypes of *Xc 41.5* × OUH602 were tested by F<sub>3</sub> analysis (*SI Dataset S1H*). For further high resolution mapping, *vrs4.k* × Golden Promise population was utilized. For initial mapping of *vrs4*, 94 to 107 F<sub>2</sub> individuals (Table S1) were analyzed. Segregation between mutant and Wt F<sub>2</sub> plants fitted well with a 3:1 ratio typical for a monogenic recessive trait (Table S1).

The *vrs4* locus was initially reported on chromosome 3H long arm 27.5 cM distal to *uzu* locus (3). The recent genotyping of *vrs4* Bowman introgression lines with BOPA markers showed SNP polymorphisms spanning from 3H short arm until extreme long arm (4). BW-NIL(*int-e.58*) is associated with SNP markers 1\_0672 to 2\_1083 (positions 38.56 to 156.06 cM), BW-NIL(*mul1.a*) with 1\_0762 and 2\_0115 (positions 38.56 and 126.83 cM), BW-NIL(*vrs4.k*) with 1\_0863 to 1\_0926 (positions 64.85 to 85.26 cM) and with 2\_1493 to 1\_1330 (positions 161.43 to 178.12 cM). In an effort to map *vrs4* to a particular chromosomal region on 3H we developed a VeraCode SNP genotyping assay with 113 BOPA SNPs mapping at regular intervals on 3H. Mapping of 36 and 26 polymorphic markers in *vrs4.k* × Golden Promise and Barke × *vrs4.k* populations localized *vrs4* between markers 3\_0571 (32.83cM) and 2\_0276 (58.64cM) in Barke × *vrs4.k* and between 3\_0953 (40.0cM), 1\_1401 (58.01cM) in *vrs4.k* × Golden Promise populations, indicating its presence either on the short arm or close to the centromere. Further marker development in this interval showed strict co-segregation of *vrs4* phenotype with the marker DQ327702 (41.68 cM on the short arm) in all five mapping populations tested (Fig. S4). Linkage analysis of segregation data was carried out using maximum likelihood algorithm of either joinmap 3.0 or MAPMAKER 3.0. Kosambi mapping function was used to convert recombination fractions into map distances. Subsequently 1,086 F<sub>2</sub> individuals were screened to identify recombinant individuals between flanking markers Hv03717

and Hv45740 (*SI Dataset S1B*). The 140 recombinant individuals identified were used for further fine mapping of the *vrs4* interval.

### **DNA preparation.**

For DNA preparation, leaf samples at the three leaf stage were collected from all the genotypes ( $F_2$  plants of five mapping populations, fine mapping population from *vrs4.k*  $\times$  Golden Promise, 20 *vrs4* mutants, respective Wts and 77 diverse barley genotypes used for haplotype analysis). DNA was prepared using either Doyle and Doyle's protocol (5) or the protocol described in Komatsuda et al. 1998 (6).

### **Haplotype analysis.**

Three primer pairs with overlapping fragments (*SI Dataset S1C*) covering 2046 bp (987 bp of 5' region, 774 bp ORF and 285 bp 3'UTR) were amplified for direct PCR sequencing using the Sanger method (BigDye Terminator v3.1 Cycle Sequencing Kit; Applied Biosystems). Fluorescently terminated extension products were separated using a capillary-based ABI3730xl sequencing system (Applied Biosystems). Multiple sequence alignments were performed using the ClustalW method (7). Haplotype analysis was conducted using the median joining algorithm implemented in NETWORK 4.6.1.0. A default weight of 10 was applied for all substitutions and indel polymorphisms.

### **Microarray hybridization and data analysis.**

By utilizing 50,000 consensus EST assembly (HarvEST) we synthesized multiple oligos for individual sequences, generated a 244K microarray (Agilent Technologies). A pilot study was conducted to identify and omit oligos with potential for cross hybridization across gene family members from spike meristem tissues. Upon selecting oligos with best Agilent base composition score, a custom eArray was designed to generate 56K Agilent barley microarray (60K  $\times$  8 plex format). All unigene sets have been annotated and functionally classified into MapMan functional categories.

Total RNA was isolated from spike meristems collected at glume, stamen and awn primordium stages from two deletion mutants (MHOR 345 and MHOR 318) and respective wild-types (Heine's Haisa and Ackermann's Donaria) using the RNA-queous MicroKit (Invitrogen). RNA concentrations were measured using NanoDrop UV-VIS spectrophotometer (Pqlab) and quality of RNA samples was measured using RNA Nano 6000 kit (Agilent) and Bioanalyzer (Agilent). The Low Input Quick Amp Labeling kit for One-color Microarray-Based Gene Expression Analysis was used for labeling of RNA samples (50ng) using Cyanine3 (Cy3) fluorescent dye following manufacturer's instructions (Agilent). Labeled cRNA samples were subsequently purified using RNeasy mini spin columns (Qiagen) according to the manufacturer's protocol. Quantity of cRNA was measured using NanoDrop, with which specific activity and yield of cRNA were calculated. 600ng of Cy3-labeled, amplified cRNA with a specific activity of above six was used for subsequent hybridization following the steps of the one-color microarray-based gene expression analysis protocol (Agilent). Hybridizations were carried out at 65°C for 17h. Slides were washed and scanned at a high resolution of 2 microns using Agilent DNA Microarray Scanner G2565CA (Agilent). The resultant 36 microarray TIF images were processed to run batch extractions by choosing appropriate grid using Agilent's Feature Extraction Software version 11.0. The quantified feature text file is first analysed for quality checks using Agilent QC chart tool. The qualified experiments were further processed, at first raw data (gene expression) was quantile normalized and fold changes were calculated between mutant and wild-type samples for all developmental stages. The differentially regulated gene sets

(>2.0 folds), with multiple correction using Bonferroni method ( $P < 0.05$ ) were identified. Top regulated genes were subjected to the co-expression analysis using spearman correlation test and complete linkage algorithm implemented in Genespring 12.0. Only differentially regulated genes in common between both mutants (MHOR 318 and MHOR 345) were considered for further analysis and interpretation.

## SI Figures

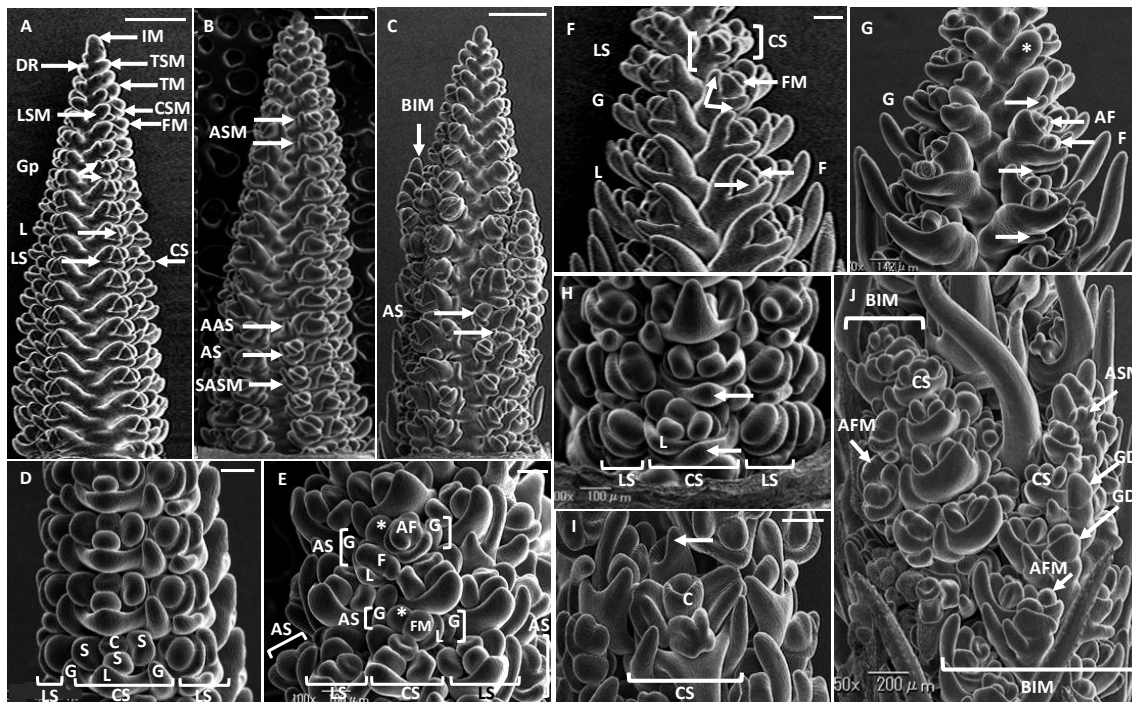

**Fig. S1.** SEM analysis of wild-type (Pirolina) and *vrs4* mutant (*vrs4.l*) spikes.

(A-C) Lateral view of inflorescences at awn primordium stage (A) Wt inflorescence shows triple spikelet meristem (TSM) producing one central spikelet meristem (CSM) and two lateral spikelet meristems (LSMs), leading to central spikelet (CS) and lateral spikelets (LSs). Gp, glume primordium of LS (B) *vrs4* inflorescence (Autumn-sown) showing LSs at an advanced stage of development, and additional spikelet meristems (ASMs) which either remain rudimentary as aborted additional spikelets (AASs) or form additional spikelets (ASs). SASM, Secondary additional spikelet meristem. (C) *vrs4* inflorescence (Spring-sown) showing branch-like inflorescence meristem (BIM), ASs, and glume defects (upper half). (D) Wt inflorescence showing two LSs and a CS having two glumes (G), and one floret containing one lemma (abaxial), three stamens (S) and one carpel. (E) *vrs4* inflorescence showing advance staged LSs, and ASs with LSs and CSs. ASs show glumes, lemma (abaxial) and a floral meristem (FM) (bottom), or a floret (top) having an additional floret (AF) on its rachilla. Asterisk indicates further development on rachilla of FM or AF. (F) Wt inflorescence showing LSs containing a single FM or floret with lemma (abaxial) and a pair of glumes. (G) *vrs4* inflorescence showing AF on rachilla of floret in opposite orientation. LSs having no glumes (asterisk) or a single glume (right-headed arrows) are visible. (H) *vrs4* inflorescence showing an additional lemma-like structure (arrows) with the lemma in CSs. (I) *vrs4* inflorescence showing an additional carpel (arrow) in opposite orientation to carpel in CS. (J) *vrs4* inflorescence showing two

BIMs having ASMs, AFMs and glume defects (GD). Scale bars:  $500\mu\text{m}$  in a-c;  $100\mu\text{m}$  in d-e, h;  $142\mu\text{m}$  in f-g, i;  $200\mu\text{m}$  in j.

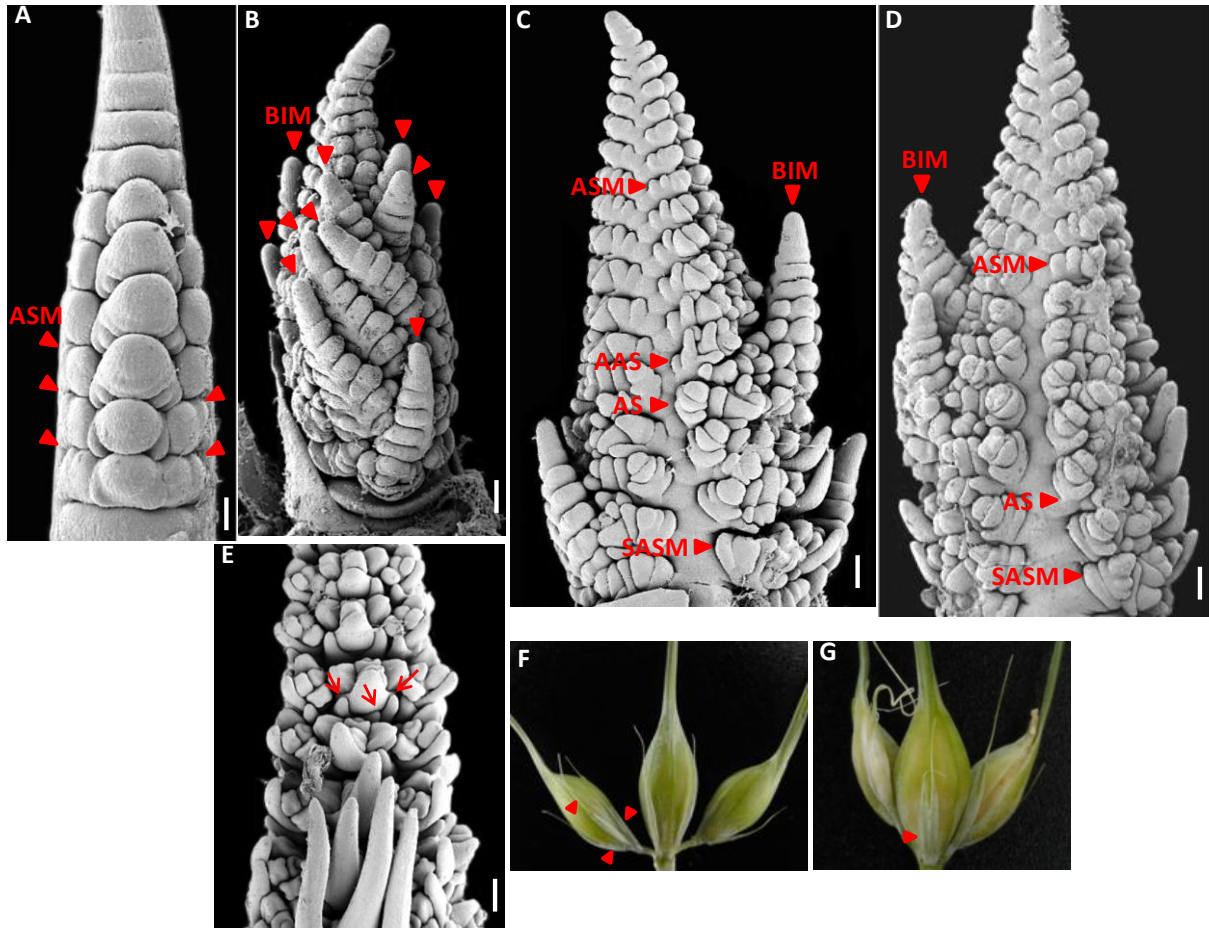

**Fig. S2.** SEM analysis of BW-NIL(*mull.a*) and BW-NIL(*vrs4.k*).

(A) BW-NIL(*mull.a*) mutant inflorescence at lemma primordium stage, showing initiation of additional spikelet meristem (ASMs) indicated by red triangles, on each side of the triple mound. (B) BW-NIL(*vrs4.k*) mutant inflorescence showing high proliferation of branch-like inflorescence meristems (BIMs) indicated by red triangles at stamen primordium stage. (C-D) BW-NIL(*vrs4.k*) (C) and BW-NIL(*mull.a*) (D) mutant inflorescences showing ASMs, additional spikelets (ASs), aborted additional spikelets (AASs), secondary additional spikelet meristems (SASM), and branch-like inflorescence meristems (BIM) at awn primordium stage. (E,F) Pictures show loss of determinacy in glume development resulting in more than two glumes per spikelet. Three glumes per spikelet are seen at awn primordium stage (E) and at maturity (F). (G) Spikelet showing partially differentiated inner and outer glumes at maturity. Scale bars:  $400\mu\text{m}$  in A and  $700\mu\text{m}$  in B-E.



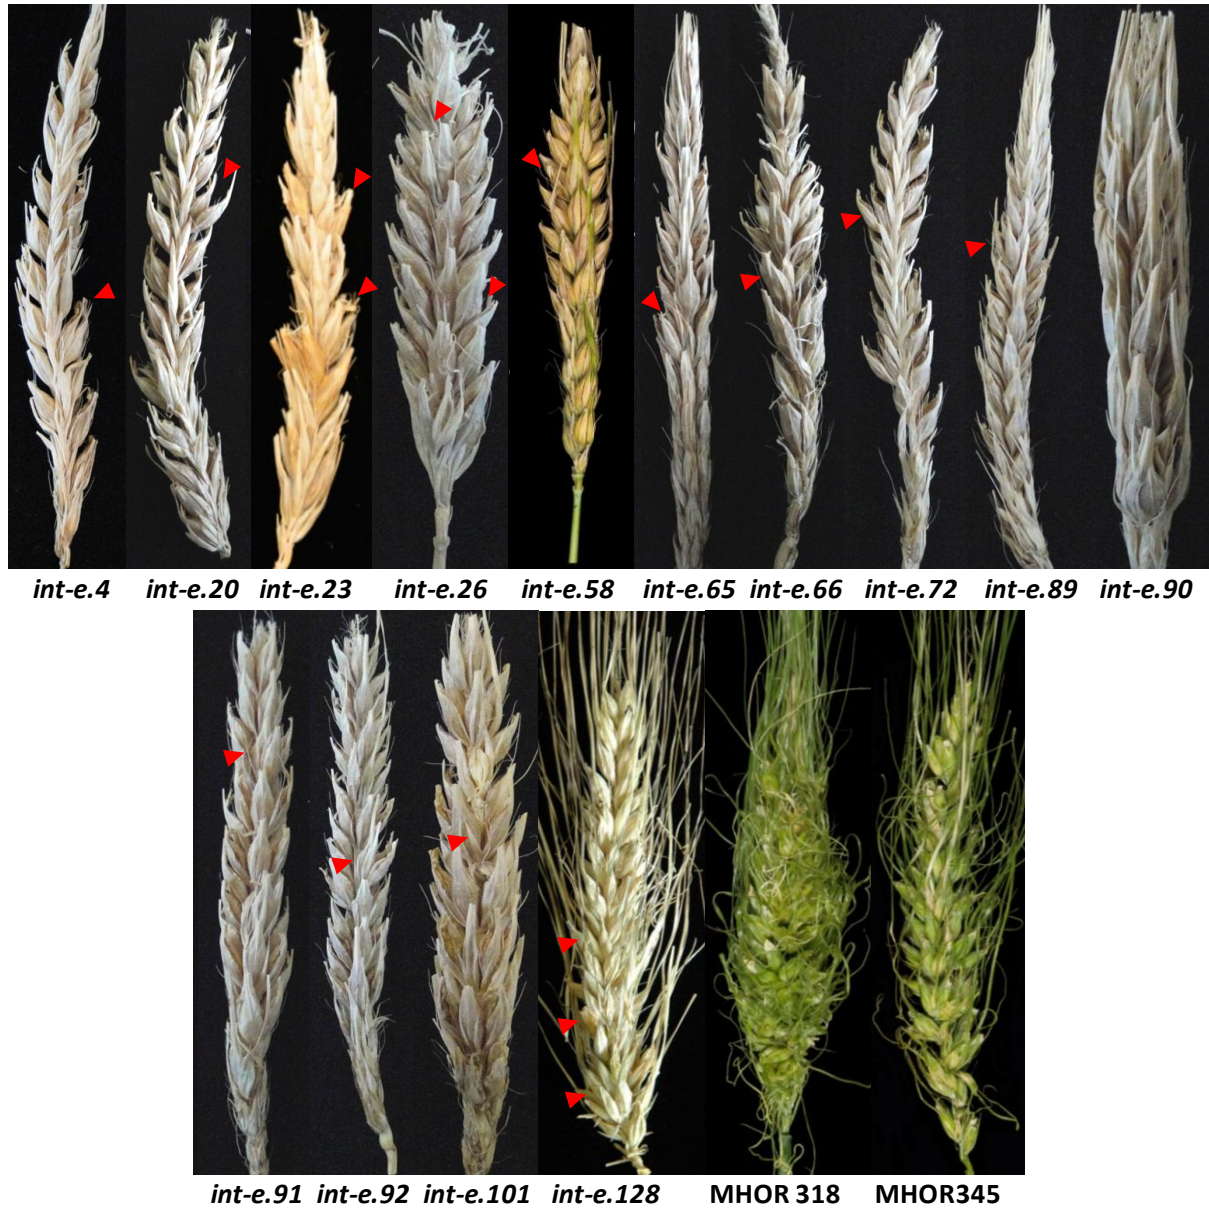

**Fig. S3.** Different *vrs4* mutant alleles showing loss of spikelet determinacy (Red triangles mark the presence of additional spikelets due to the indeterminate nature of the TSM). The MHOR mutants MHOR 318 and MHOR 345 show a high degree of indeterminacy of the TSM probably due to the complete deletion of *HvRA2*.

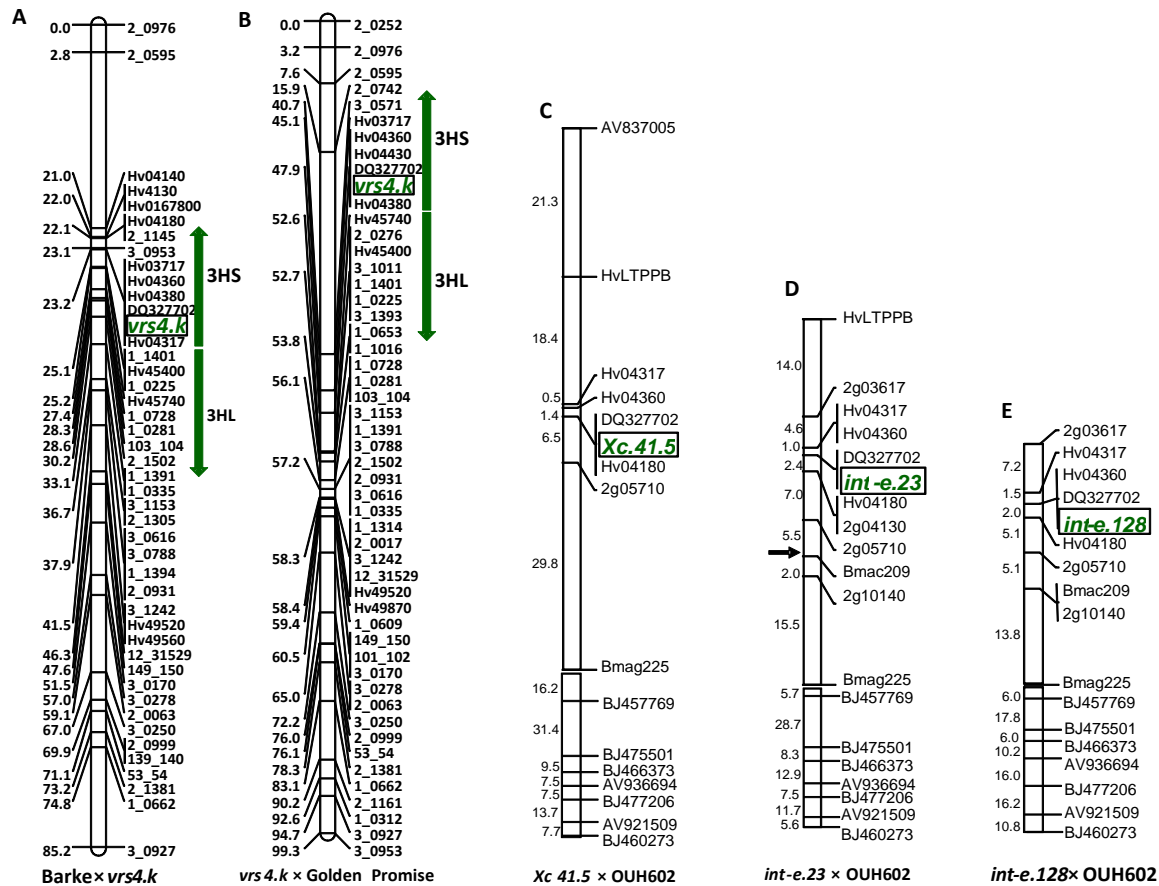

**Fig. S4.** Linkage maps for the *vrs4* locus on barley chromosome 3H.

(A-E) Linkage maps were developed based on five  $F_2$  mapping populations. The scale of the maps has been reduced in the lower parts for C,D,E. The number of gametes analyzed in the upper parts (above Bmag225) are 214 (C), 210 (D) and 214 (E). 58 gametes were analyzed in the lower parts (below Bmag225) for C,D,E. Map distances are shown in centiMorgans. Arrow shows the location of centromere. *Xc.41.5 syn. vrs4.l*.

```

G
1 ATG GCA TCC CCG TCG AGC ACC GGC AAC TCC ATC GTC TCC GTG GTG GTT (int-e.128-SNP-Nonsense mutation) 48
1 M A S P S S T G N S I V S V V V 16
(mul1.a-11bp deletion-Nonsense mutation)
(int-e.65, .89, .90, .91, .92- Missense)
(vrs4.k-1bp deletion-Nonsense mutation)
(int-e.87/int-e.101-Missense mutation)
49 --- --- A - A 96
17 GCA GCG GCC ACG ACA CCG GGG GCG GCG CCG TGC GCT GCG TGC AAG 32
A A A T T P G A G A P C A A C K
E E

97 TTC CTG CCG CGC AAG TGC CTC CCC GGC TGC GTG TTC GCG CCC TAC TTC 144
33 F L R R K C L P G C V F A P Y F 48

145 CCG CCG GAG GAG CCG CAG AAG TTC GCC AAC GTG CAC AAG GTG TTC GGC 192
49 P P E E P Q K F A N V H K V F G 64

T
193 GCC AGC AAC GTG ACC AAG CTG CTC AAC GAG CTG CCG CCG CAC CAG CGG 240
65 A S N V T K L L N E L P P H Q R 80

V
T
241 GAA GAC GGC GTG AGC TCG CTG GCC TAC GAG GCG GAG GCG CGG GTC AAG 288
81 E D A V S S L A Y E A E A R V K 96

V
289 GAC CCC GTC TAC GGC TGC GTC GGC GCC ATC TCC GTG CTC CAG CGC CAG 336
97 D P V Y G C V G A I S V L Q R Q 112

337 GTC CAC CGC CTC CAG AAG GAG CTC GAC GCC GCG CAC ACC GAG CTC CTC 384
V H R L Q K E L D A A H T E L L 128

T
385 CCG TAC GCC TGC GGC GAG CTC GGC AGC ATC CCC ACC GCG CTC CCC GTT 432
129 R Y A C G E L G S I P T A L P V 144
L

433 GTC ACG GCC GGC GTC CCC AGC GGC AGG CTC TCA TCC GCC GTA ATG CCC 480
145 V T A G V P S G R L S S A V M P 160

T
481 TGC CCC GGC CAG CTC GCC GGC GGC ATG TAC AGC GGT GGC GGT GGC GGT - (int-e.26-SNP-Nonsense mutation) 528
161 C P G Q L A G G M Y S G G G G G 176

(vrs4.l-19bp deletion-Nonsense mutation)
529 GGC TTC CCG AGG CTC GGG CTT GTG GAC GCG ATA GTA CCA CAG CCC CCT 576
177 G F R R L G L V D A I V P Q P P 192

577 CTT TCC GCC GGC TGC TAC TAC AAT ATG CCG AGC AAC AAC AAC GCT GGA 624
193 L S A G C Y Y N M R S N N N A G 208

625 GGC AGC GTC GCT GCC GAC GTG GCG CCC GTT CAG ATC CCC TAC GCC TCC 672
209 G S V A A D V A P V Q I P Y A S 224

673 ATG GCG AAT TGG GCC GTG AAC GCC ATT AGC ACC ATT ACC ACC ACC TCA 720
225 M A N W A V N A I S T I T T T S 240

721 GGA TCA GAG AGC ATT GGG ATG GAT CAC AAG GAA GGA GGC GAC AGC AGC 768
241 G S E S I G M D H K E G G D S S 256

769 ATG TGA ACTGACGCGCCCAACCAACAgtgagtgcccgcttgagtaaatcgctgactgta 829
257 M *
830 atcatgcgtgtatatatgctagcttcatgagttatctaagtgcattcttgccttgtgcag 891
892 TGAATGTGGATTACCTCTCCTACTCTCAAGATTTATGGATGTGGAGAATGATATGCGCTTTGG 954
955 CCGGCTTGACGCTCAAGGAAGGAAGCTTCGGGGAGACTGATGGGATCGAGCTAGCTCATTCC 1017
1018 CAGGATAATTAAGCTAAGAAGCAATCTATCTATGAATCTATCTATATATAGCCAACATGAATT 1080
1081 ATATATGTCAGTGTCTCCCTTTTTGTCATGTTGTGCAAGCCATACTTTGTGTGACTTTGGAGT 1143
1144 TCTATATGTAATCGAATCGAGATCTAGCTTGATCTCTCTCTTT 1187

```

**Fig. S5.** *HvRA2* (*Vrs4*) nucleotide and protein sequences showing mutated positions and effects for sixteen *Vrs4* mutant alleles. Small deletions and SNPs in the *vrs4* mutant alleles leading to frame shifts, non-synonymous changes and premature stop codons have been indicated in respective colors with that of mutant alleles. The sequence in the boxed area represents the LOB domain. The blue highlighted sequence at the 3' end marks the 3'-UTR, the underlined region within the 3'-UTR indicates the intron.

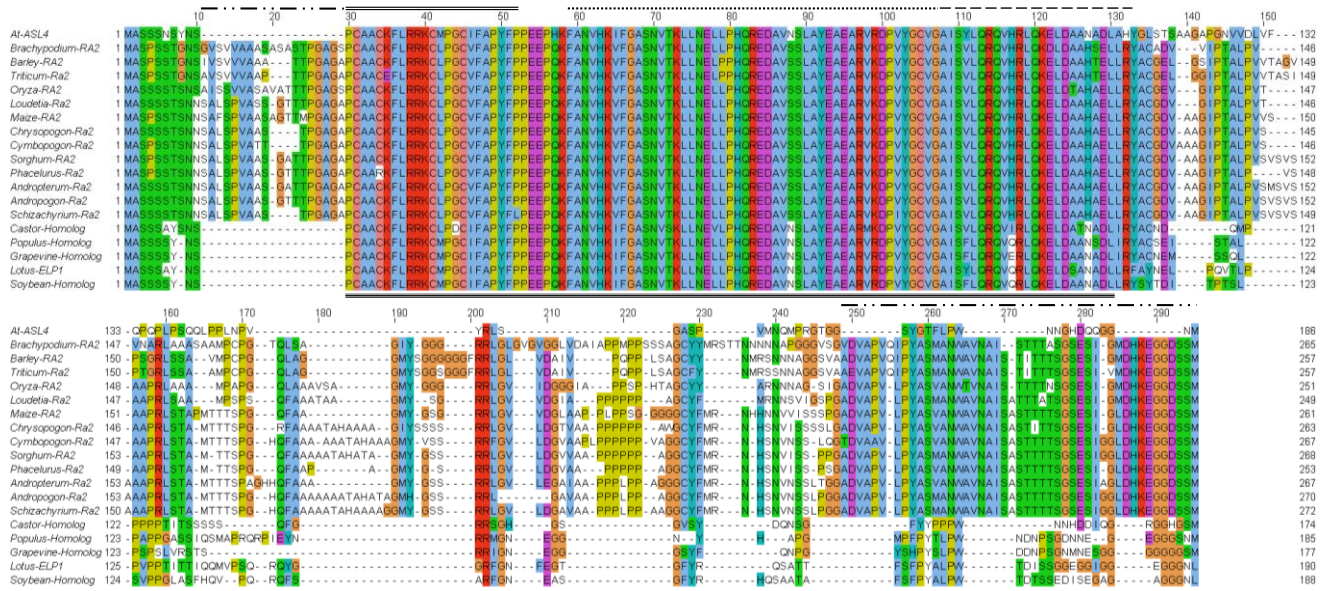

**Fig. S6.** RA2 and RA2-like proteins in grasses and eudicots.

Multiple sequence alignment of RA2 proteins in monocotyledonous and dicotyledonous species. The unique grass specific domains at N-terminal and C-terminal are indicated with a combination of dashed and dotted lines; LOB domain is marked with a triple line (The components of LOB domain such as Cysteine rich region, GAS block and Leucine Zipper coiled coil motif are marked with double, dotted and dashed lines respectively). GenBank accession numbers for RA2 & RA2-like proteins are listed in Table S6.

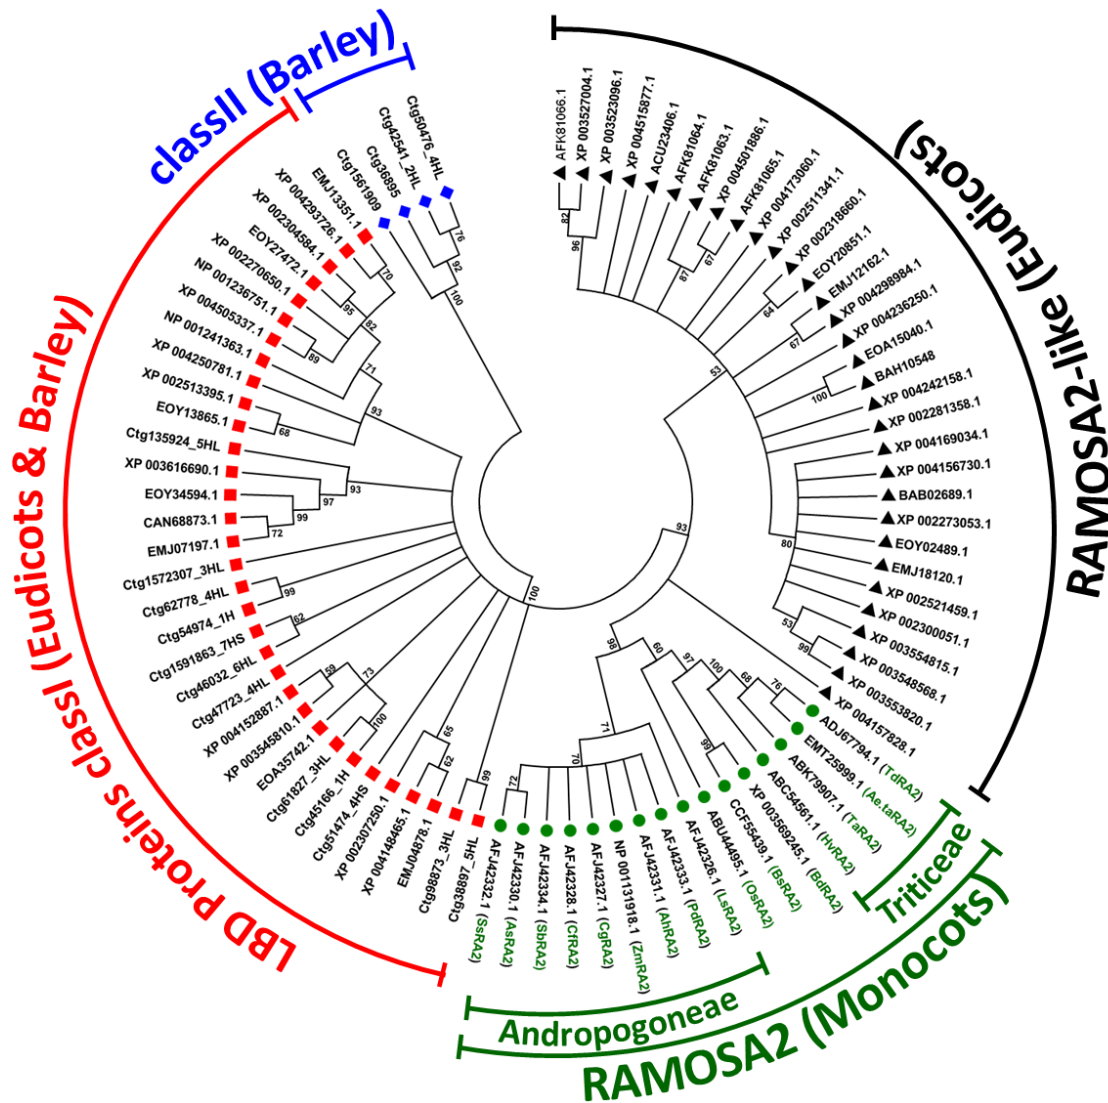

**Fig. S7.** Phylogenetic analysis of RAMOSA2 orthologs/homologs and other LBD proteins. A maximum likelihood phylogenetic tree (condensed tree) of RAMOSA2 orthologs (RAMOSA2 proteins from grasses) and homologs (RA2-LIKE proteins from eudicot species) together with other LBD proteins from barley and eudicots. From the phylogenetic tree two separate clades are evident; one clade carrying the LBD proteins other than RAMOSA2 orthologs/homologs and the other with RAMOSA2 orthologs and homologs. The clade carrying RAMOSA2 orthologs/homologs has two sub clades, one with the RAMOSA2 orthologs from grasses and the other with RAMOSA2 homologs. Eudicot homologs of RAMOSA2 are indicated by black triangles, orthologs from monocots are indicated by green circles, class I barley and Eudicot LBD proteins other than RAMOSA2 orthologs/homologs are marked by red squares. Class II barley LBD proteins indicated by blue squares are clearly separated from all the remaining class I LOB domain proteins. For descriptions of class I and class II LOB domain proteins refer to Shuai et al. 2002 (8). Td: *Triticum durum*; Ae.ta: *Aegilops tauschii*; Ta: *Triticum aestivum*; Hv: *Hordeum vulgare*; Bd: *Brachypodium distachyon*; Bs: *Brachypodium sylvaticum*; Os: *Oryza sativa*; Ls: *Loudetia spp.*; Pd: *Phacelurus digitatus*; Ah: *Andropogon hallii*; Zm: *Zea mays*; Cg: *Chrysopogon gryllus*; Cf: *Cymbopogon*

*flexosus*; Sb: *Sorghum bicolor*; As: *Andropterum stolzii*; Ss: *Schizachyrium sanguineum*. (Please refer to Table S6 for the details of protein accessions used in phylogenetic analysis).

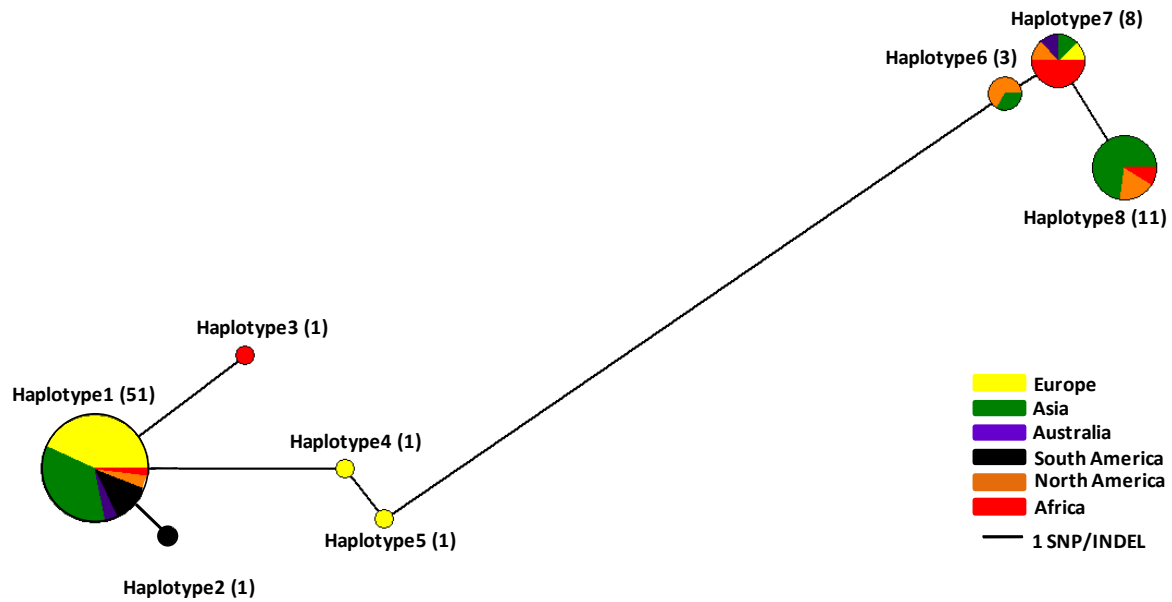

**Fig. S8.** *HvRA2* nucleotide-haplotype analysis.

Circles denote the relative number of samples represented in each *Vrs4* haplotype. Number of accessions within a particular haplotype is indicated in brackets. Pie slices within the circles indicate geographic distribution of haplotypes. Lines connecting haplotypes denote number of mutations (SNPs or deletions) that distinguish different haplotypes. (See *SI Dataset S1C* for haplotype structure of the eight haplotypes identified).

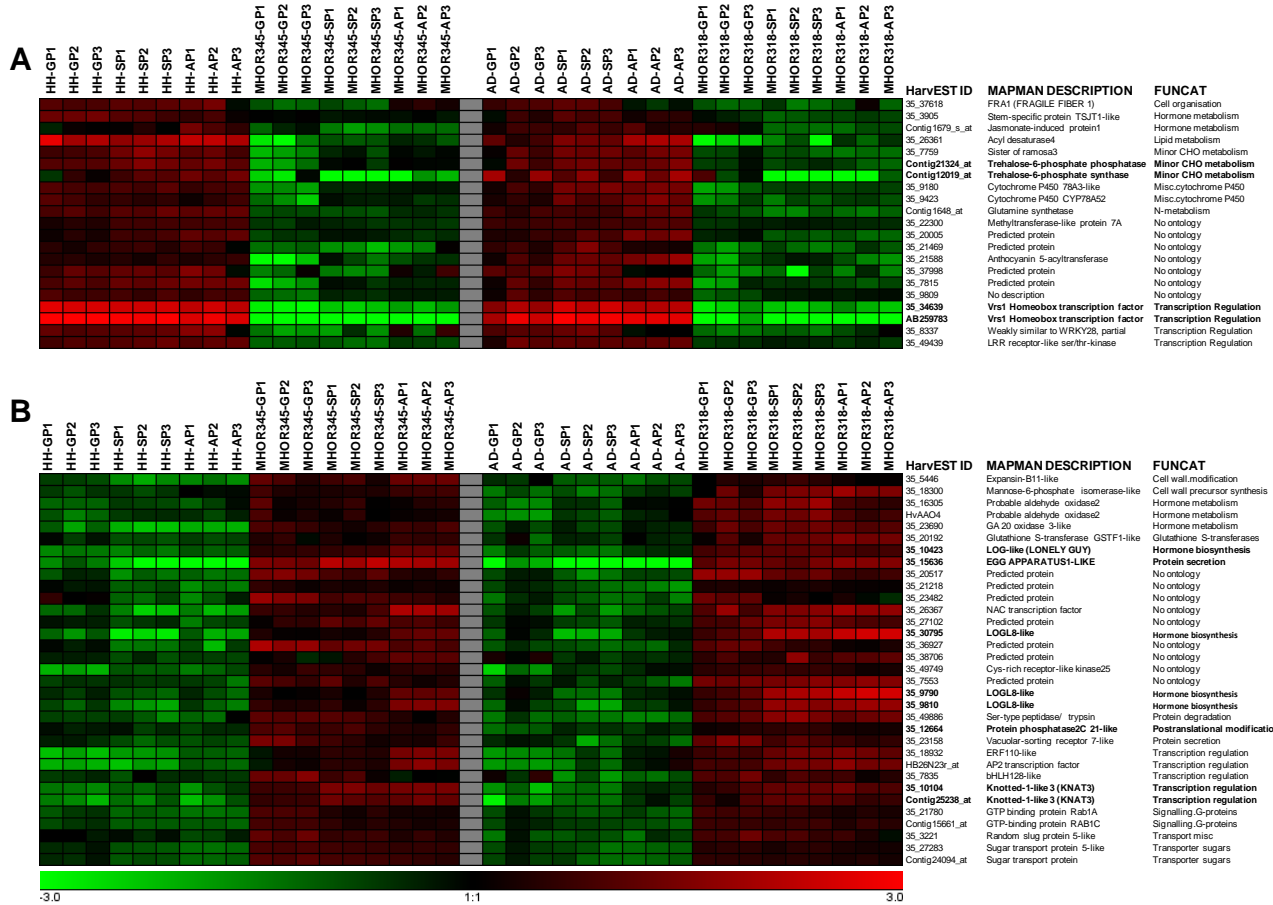

**Fig. S9.** Transcriptome analysis of *vrs4* using microarray.

(A-B) Microarray heat maps show genes conjointly down-regulated (A), up-regulated (B) in two *vrs4* deletion mutants (MHOR 318 and MHOR 345) and their respective wild-types (Ackermann's Donaria and Heine's Haisa). GP: glume primordium, SP: stamen primordium, AP: awn primordium. The scale at the bottom of the heat maps indicates the level of differential regulation observed for different genes between Wt and mutant (green color indicates down-regulation and red color indicates up-regulation).

**A**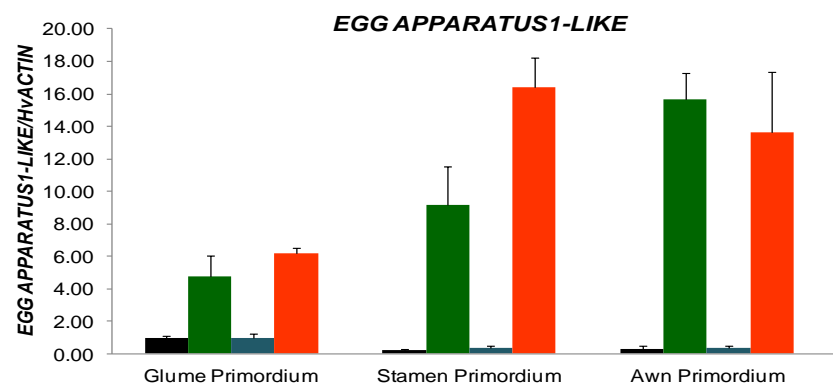**B**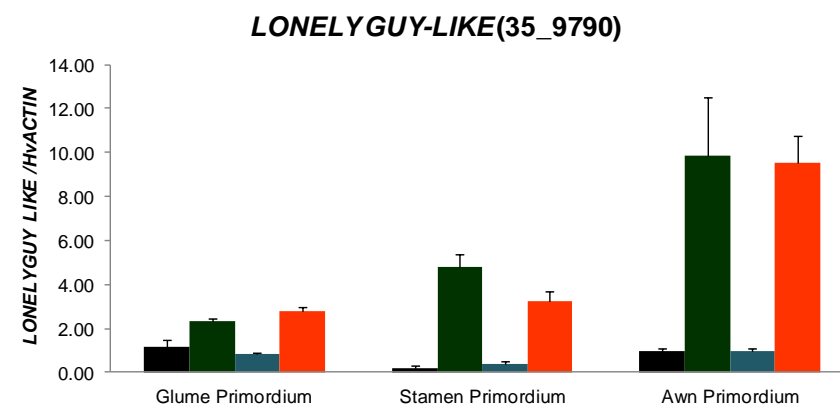**C**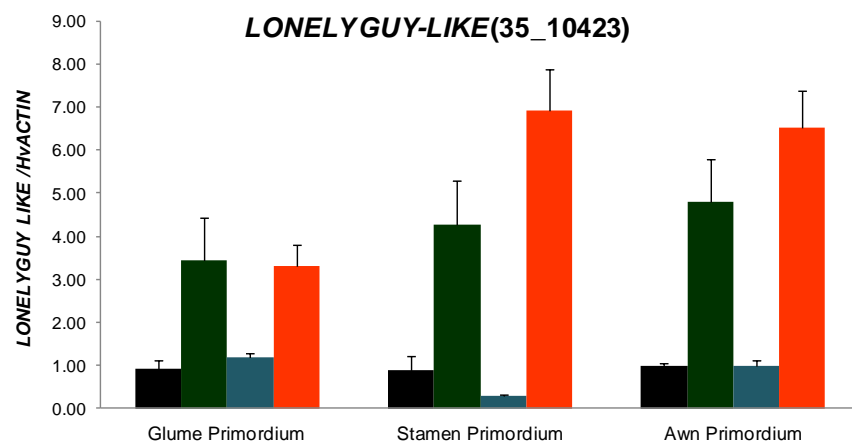**D**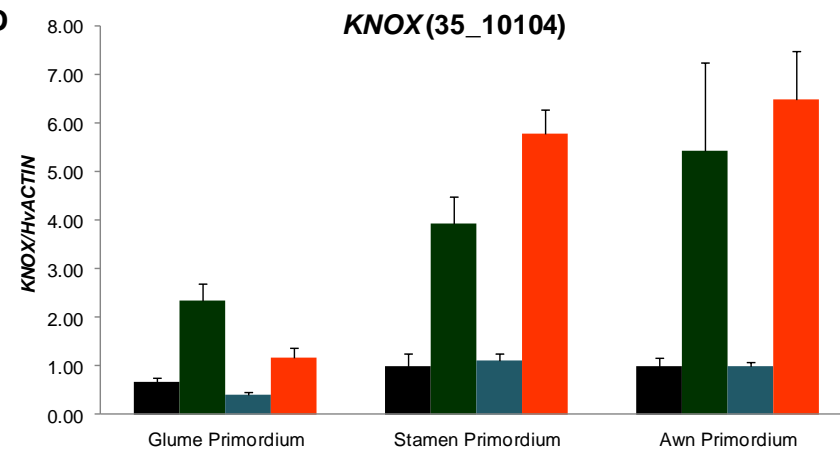**Legend**

- AD
- MHOR318
- HH
- MHOR345



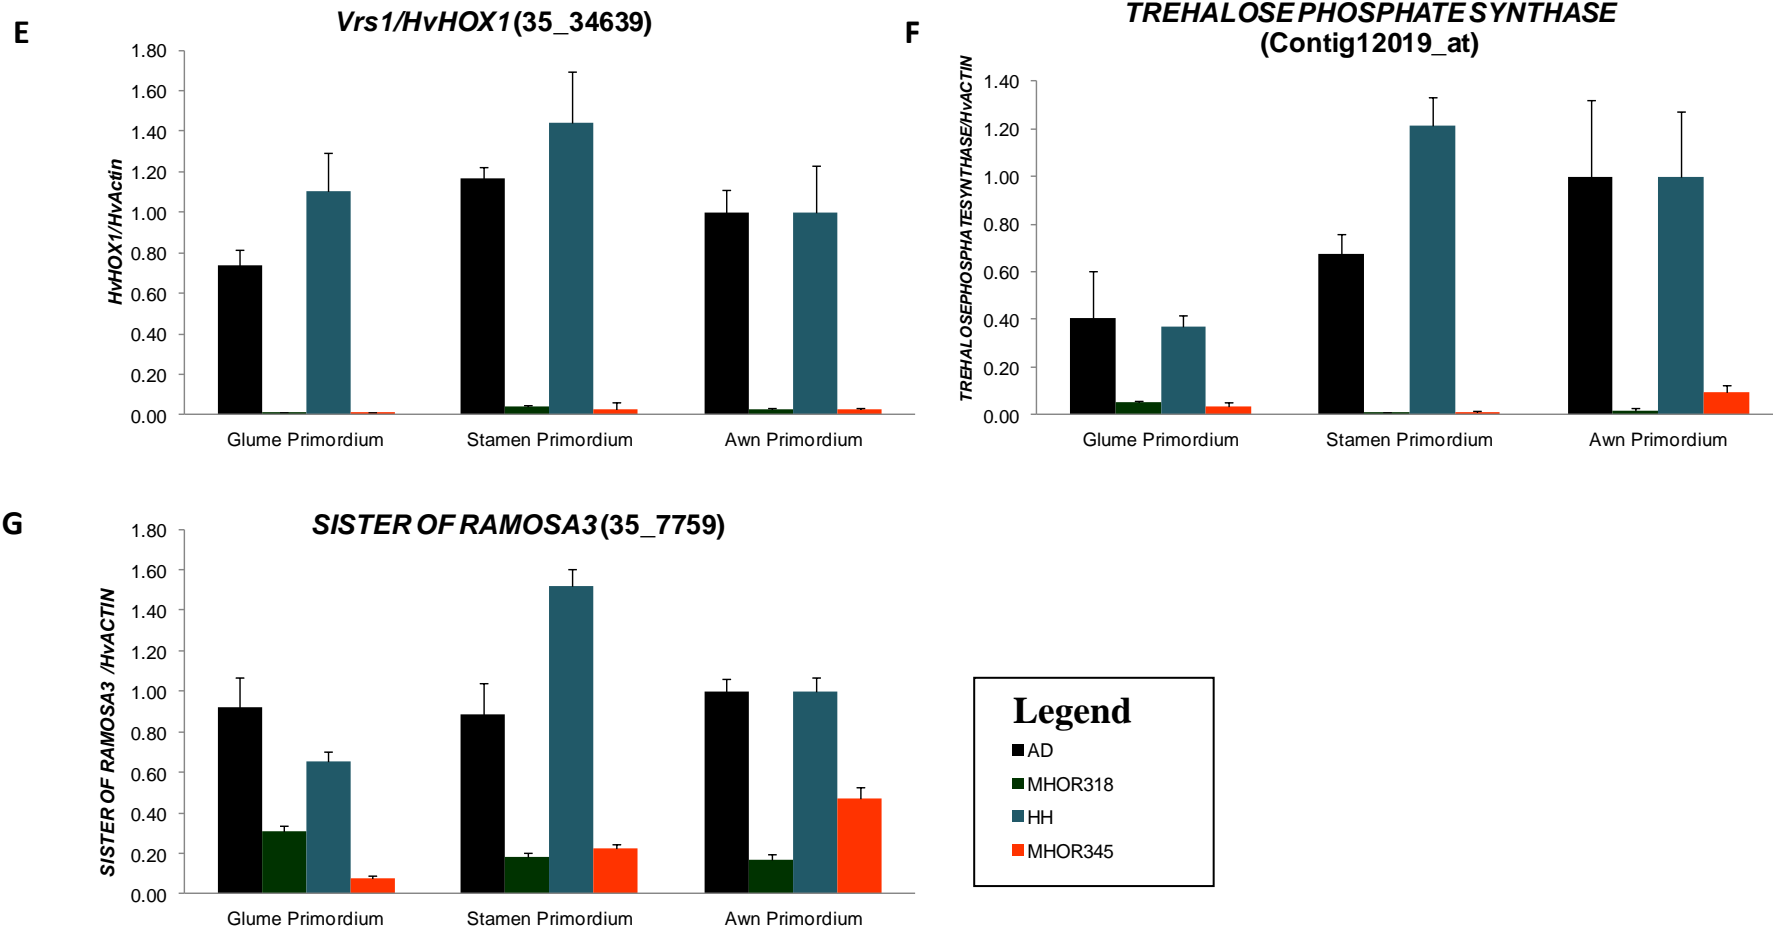

**Fig. S10.** qRT-PCR validation of differentially regulated genes identified in the *vrs4* microarray experiment. (A-D) qRT-PCR validation of genes up-regulated in MHOR 318, MHOR 345 in comparison to their respective wild-types Ackermann's Donaria (AD) and Heine's Haisa (HH). The validated genes include *EGG APPARTUS1* (A), *LONELY GUY-LIKE* (B-C) and *KNOX* (D). (E-G) qRT-PCR validation of genes down-regulated in mutants in comparison to their respective wild-types, include *Vrs1* (E) *TREHALOSE PHOSPHATE SYNTHASE* (F), *SISTER OF RAMOSA3* (G). RNA samples from three spike developmental stages (glume primordium, stamen primordium and awn primordium) were analyzed. Mean  $\pm$  S.E of three biological replicates is shown.

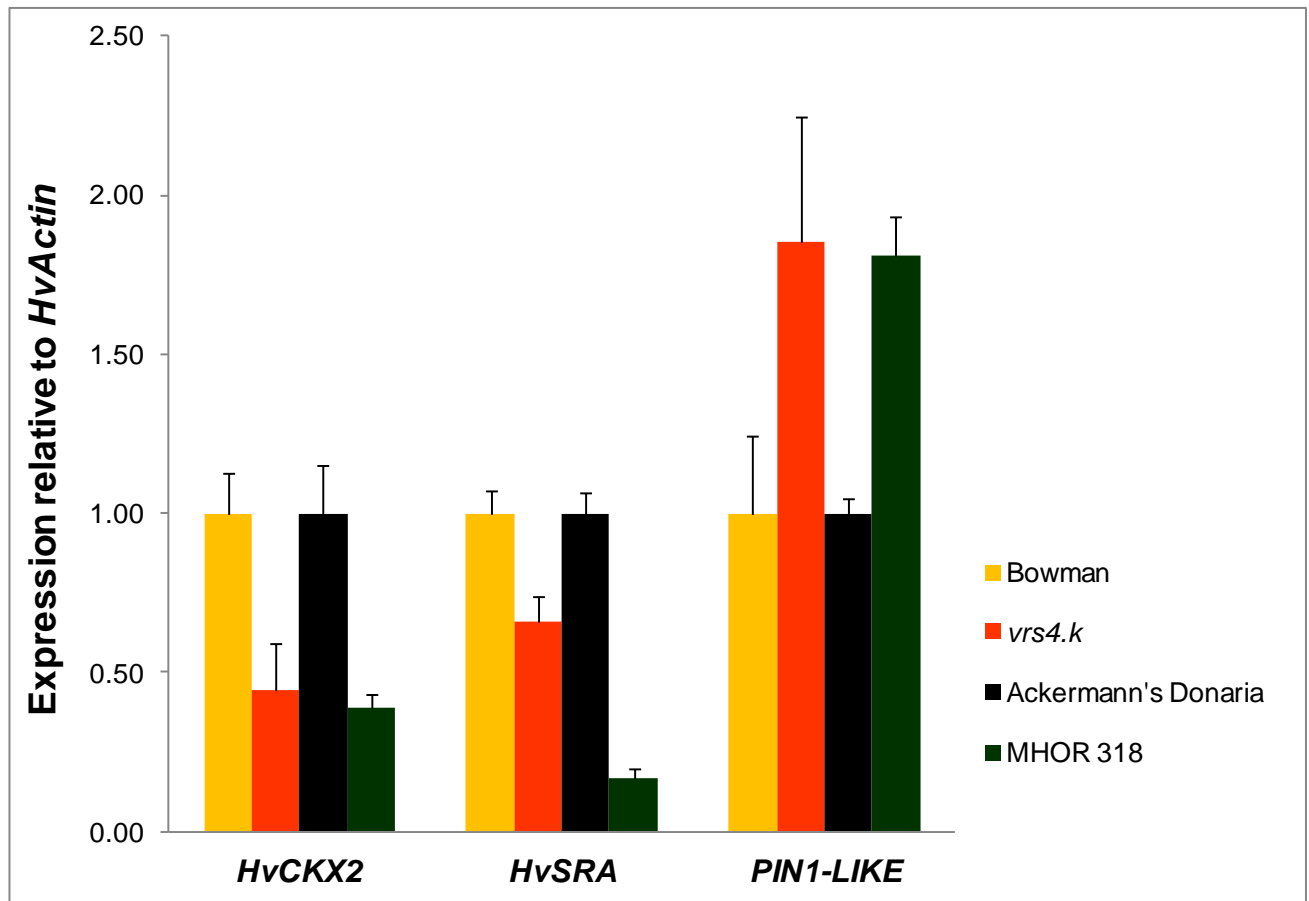

**Fig. S11.** Relative expression of *HvCKX2*, *HvSRA* and *HvPIN1-LIKE* in BW-NIL(*vrs4.k*), MHOR 318 and their respective wild-types Bowman and Ackermann's Donaria. RNAs sampled at awn primordium were used to quantify the expression. Constitutively expressed *HvActin* gene was used to normalize expression of target genes. Error bars indicate mean $\pm$ S.E. of three replicates.

## SI Tables

**Table S1.** Segregation analysis of *vrs4* mutants in five F<sub>2</sub> mapping populations.

| <b>Crosses</b>                 | <b># of F<sub>2</sub> individuals<br/>(gametes)</b> | <b>Wild-type</b> | <b>Mutant</b> | <b><math>\chi^2</math>/P-value<br/>for 3:1</b> |
|--------------------------------|-----------------------------------------------------|------------------|---------------|------------------------------------------------|
| <i>Xc 41.5</i> × OUH602        | 107 (214)                                           | 84               | 23            | 0.701/0.402                                    |
| <i>int-e.23</i> × OUH602       | 105 (210)                                           | 84               | 21            | 1.400/0.236                                    |
| <i>int-e.128</i> × OUH602      | 107 (214)                                           | 88               | 19            | 2.994/0.083                                    |
| <i>vrs4.k</i> × Golden Promise | 94 (188)                                            | 71               | 23            | 0.014/0.905                                    |
| Barke × <i>vrs4.k</i>          | 94 (188)                                            | 71               | 23            | 0.014/0.905                                    |

**Table S2.** Annotations of putative genes present in the *vrs4* syntenic interval of *Brachypodium* based on initial mapping.

| <b><i>Brachypodium</i> gene</b> | <b>Annotation</b>                                             | <b>e-value</b> |
|---------------------------------|---------------------------------------------------------------|----------------|
| Bradi2g03717.1                  | peptidase M48 like                                            | 0.0            |
| Bradi2g03730.1                  | pentatricopeptide repeat-containing protein                   | 0.0            |
| Bradi2g03740.1                  | sphingosine-1-phosphate lyase-like                            | 0.0            |
| Bradi2g03750.1                  | Putative expressed protein                                    | 0.0            |
| Bradi2g03760.1                  | 40S ribosomal protein S5-2-like                               | 7E-149         |
| Bradi2g03770.1                  | Putative expressed protein                                    | 0.0            |
| Bradi2g03777.1                  | monocopper oxidase-like protein SKU5-like isoform 1           | 0.0            |
| Bradi2g03790.1                  | BFR2-like                                                     | 0.0            |
| Bradi2g03800.1                  | cysteine synthase, chloroplastic/chromoplastic-like isoform 1 | 0.0            |
| Bradi2g03807.1                  | GDSL esterase/lipase                                          | 0.0            |
| Bradi2g03820.1                  | FKBP12-interacting protein of 37 kDa-like                     | 0.0            |
| Bradi2g03825.1                  | embryonic abundant protein 1-like                             | 4E-46          |
| Bradi2g03830.1                  | transcription factor bHLH51-like                              | 2E-154         |
| Bradi2g03840.1                  | pyruvate decarboxylase isozyme 2-like                         | 0.0            |
| Bradi2g03850.1                  | wall-associated receptor kinase 2-like                        | 0.0            |
| Bradi2g03860.1                  | E3 ubiquitin-protein ligase SIAH1-like                        | 4E-116         |
| Bradi2g03870.1                  | E3 ubiquitin-protein ligase SIAH1-like                        | 7E-77          |
| Bradi2g03880.1                  | receptor-like protein 12-like                                 | 2E-170         |
| Bradi2g03890.1                  | receptor-like protein 12-like                                 | 0.0            |
| Bradi2g03900.1                  | receptor-like protein 12-like                                 | 2E-165         |
| Bradi2g03910.1                  | receptor-like protein 12-like                                 | 0.0            |
| Bradi2g03920.1                  | LRR receptor-like serine/threonine-protein kinase GSO1-like   | 0.0            |
| Bradi2g03930.1                  | Putative expressed protein                                    | 2E-52          |
| Bradi2g03940.5                  | Putative expressed protein                                    | 0.0            |
| Bradi2g03947.1                  | DEAD-box ATP-dependent RNA helicase                           | 0.0            |
| Bradi2g03960.1                  | DEAD-box ATP-dependent RNA helicase 18-like                   | 0.0            |
| Bradi2g03970.1                  | probable protein phosphatase 2C 1-like                        | 7E-177         |
| Bradi2g03980.1                  | Golgi to ER traffic protein 4 homolog                         | 0.0            |
| Bradi2g03990.1                  | breast cancer 2 -like                                         | 0.0            |
| Bradi2g04000.1                  | dehydration-responsive element-binding protein 2A-like        | 0.0            |
| Bradi2g04010.1                  | E3 ubiquitin-protein ligase RING1-like                        | 0.0            |
| Bradi2g04020.1                  | zinc transporter 1-like                                       | 6E-113         |
| Bradi2g04030.1                  | uncharacterized protein                                       | 0.0            |
| Bradi2g04040.3                  | KEAP1                                                         | 2E-163         |
| Bradi2g04050.1                  | Putative expressed protein                                    | 0.0            |
| Bradi2g04060.1                  | Putative expressed protein                                    | 0.0            |
| Bradi2g04070.1                  | Putative expressed protein                                    | 0.0            |
| Bradi2g04080.1                  | Putative expressed protein                                    | 0.0            |

|                |                                                                           |        |
|----------------|---------------------------------------------------------------------------|--------|
| Bradi2g04090.1 | Putative expressed protein                                                | 0.0    |
| Bradi2g04100.1 | probable ubiquitin-conjugating enzyme E2 25-like                          | 1E-154 |
| Bradi2g04110.1 | proactivator polypeptide-like 1-like                                      | 1E-163 |
| Bradi2g04117.1 | mini-chromosome maintenance complex-binding protein-like                  | 0.0    |
| Bradi2g04130.1 | uncharacterized membrane protein At1g06890-like                           | 0.0    |
| Bradi2g04140.1 | hypothetical protein                                                      | 0.0    |
| Bradi2g04150.1 | Putative expressed protein                                                | 0.0    |
| Bradi2g04160.1 | pentatricopeptide repeat-containing protein At5g66631-like                | 0.0    |
| Bradi2g04170.1 | Putative expressed protein                                                | 0.0    |
| Bradi2g04180.3 | Putative expressed protein                                                | 0.0    |
| Bradi2g04190.1 | Putative expressed protein                                                | 0.0    |
| Bradi2g04197.1 | zinc finger, C3HC4 type family protein                                    | 0.0    |
| Bradi2g04210.1 | autophagy 18D-like protein                                                | 0.0    |
| Bradi2g04220.1 | DUF246 domain-containing protein At1g04910-like                           | 0.0    |
| Bradi2g04230.1 | catalytic/ hydrolase                                                      | 6E-125 |
| Bradi2g04240.1 | flavin-containing monooxygenase YUCCA10-like                              | 3E-128 |
| Bradi2g04247.1 | flavin-containing monooxygenase YUCCA10-like                              | 0.0    |
| Bradi2g04257.1 | flavin-containing monooxygenase YUCCA10-like                              | 0.0    |
| Bradi2g04270.1 | ramosa2                                                                   | 3E-91  |
| Bradi2g04280.1 | RST1                                                                      | 0.0    |
| Bradi2g04290.1 | tryptophan aminotransferase-related protein 2-like                        | 0.0    |
| Bradi2g04297.1 | Putative expressed protein                                                | 0.0    |
| Bradi2g04310.1 | galactinol--sucrose galactosyltransferase-like                            | 0.0    |
| Bradi2g04317.1 | D111/G-patch domain-containing protein                                    | 1E-88  |
| Bradi2g04330.1 | probable LRR receptor-like serine/threonine-protein kinase At4g26540-like | 0.0    |
| Bradi2g04340.1 | Putative expressed protein                                                | 0.0    |
| Bradi2g04350.1 | F-box domain containing protein                                           | 8E-98  |
| Bradi2g04360.1 | putative ZmEBE-1 protein                                                  | 0.0    |
| Bradi2g04370.1 | Putative expressed protein                                                | 0.0    |
| Bradi2g04380.1 | universal stress protein A-like protein-like                              | 1E-117 |

**Table S3.** List of barley LOB domain (LBD) containing genes used for phylogenetic analysis.

| <b>LBD gene contig</b> | <b>LBD Class</b> | <b>Partial/Complete</b> |
|------------------------|------------------|-------------------------|
| Ctg2547112_3HS         | Class I          | Complete                |
| Ctg45166_1H            | Class I          | Complete                |
| Ctg51474_4HS           | Class I          | Complete                |
| Ctg135924_5HL          | Class I          | Complete                |
| Ctg54974_1H            | Class I          | Complete                |
| Ctg46032_6HL           | Class I          | Complete                |
| Ctg1572307_3HL         | Class I          | Complete                |
| Ctg62778_4HL           | Class I          | Complete                |
| Ctg47723_4HL           | Class I          | Complete                |
| Ctg1591863_7HS         | Class I          | Complete                |
| Ctg38897_5HL           | Class I          | Complete                |
| Ctg61827_3HL           | Class I          | Complete                |
| Ctg98873_3HL           | Class I          | Complete                |
| Ctg42541_2HL           | Class II         | Complete                |
| Ctg50476_4HL           | Class II         | Complete                |
| Ctg1561909             | Class II         | Complete                |
| Ctg36895               | Class II         | Complete                |
| Ctg39781_4HL           | Class I          | Partial                 |
| Ctg63283_3HL           | Class I          | Partial                 |
| Ctg1559770_4HL         | Class I          | Partial                 |
| Ctg39524_1H            | Class I          | Partial                 |
| Ctg41408_4HS           | Class I          | Partial                 |
| Ctg40527_1H            | Class I          | Partial                 |

Contig IDs represent LBD gene containing Morex contigs available from IPK Barley BLAST server

**Table S4.** *vrs4* mutant descriptions.

| #  | Mutant allele                         | Progenitor             | Background/<br>corresponding <i>Vrs1</i><br>allele | Mutagen                               | Mapping study                                            | Type of<br>mutation | Polymorphism/Position*    |
|----|---------------------------------------|------------------------|----------------------------------------------------|---------------------------------------|----------------------------------------------------------|---------------------|---------------------------|
| 1  | <i>int-e.4</i>                        | Bonus                  | Bonus/ <i>Vrs1.b3</i> (9)**                        | Neutrons                              | Lundqvist 1991(10)                                       | No mutation         | —                         |
| 2  | <i>int-e.20</i>                       | Foma                   | Foma/ <i>Vrs1.b3</i> (9)                           | Neutrons                              | Lundqvist 1991(10)                                       | No mutation         | —                         |
| 3  | <i>int-e.23</i>                       | Foma                   | Foma/ <i>Vrs1.b3</i> (9)                           | Propyl Methane<br>Sulfonate           | Lundqvist 1991(10)                                       | Mis-sense           | Transition (C to T) 194bp |
| 4  | <i>int-e.26</i>                       | Foma                   | Foma/ <i>Vrs1.b3</i> (9)                           | Neutrons + Ethyl<br>Methane Sulfonate | Lundqvist 1991(10)                                       | Non-sense           | Transition (C to T)/490bp |
| 5  | BW-NIL( <i>int-e.58</i> )             | Kristina               | Bowman/ <i>Vrs1.b3</i> (11)                        | Ethyl Methane Sulfonate               | Lundqvist 1991(10)<br>Druka et al 2011(4)                | Mis-sense           | Transition (C to T) 248bp |
| 6  | <i>int-e.65</i>                       | Bonus                  | Bonus/ <i>Vrs1.b3</i> (9)                          | Sodium Azide                          | Lundqvist 1991(10)                                       | Mis-sense           | Transition (G to A)/68bp  |
| 7  | <i>int-e.66</i>                       | Kristina               | Kristina/ <i>Vrs1.b3</i> (9)                       | Ethyl Methane Sulfonate               | Lundqvist 1991(10)                                       | Mis-sense           | Transition (C to T)/428bp |
| 8  | <i>int-e.72</i>                       | Bonus                  | Bonus/ <i>Vrs1.b3</i> (9)                          | X-rays                                | Unpublished                                              | Mis-sense           | Transition (C to T) 248bp |
| 9  | <i>int-e.87</i>                       | Bonus                  | Bonus/ <i>Vrs1.b3</i> (9)                          | Sodium Azide                          | Unpublished                                              | Mis-sense           | Transition (G to A)/74bp  |
| 10 | <i>int-e.89</i>                       | Hege                   | Hege/ <i>Vrs1.b</i>                                | Sodium Azide                          | Unpublished                                              | Mis-sense           | Transition (G to A)/68bp  |
| 11 | <i>int-e.90</i>                       | Hege                   | Hege/ <i>Vrs1.b</i>                                | Sodium Azide                          | Unpublished                                              | Mis-sense           | Transition (G to A)/68bp  |
| 12 | <i>int-e.91</i>                       | Hege                   | Hege/ <i>Vrs1.b</i>                                | Sodium Azide                          | Unpublished                                              | Mis-sense           | Transition (G to A)/68bp  |
| 13 | <i>int-e.92</i>                       | Hege                   | Hege/ <i>Vrs1.b</i>                                | Sodium Azide                          | Unpublished                                              | Mis-sense           | Transition (G to A)/68bp  |
| 14 | <i>int-e.101</i>                      | Hege                   | Hege/ <i>Vrs1.b</i>                                | Sodium Azide                          | Unpublished                                              | Mis-sense           | Transition (G to A)/74bp  |
| 15 | <i>int-e.128</i>                      | Foma                   | Foma/ <i>Vrs1.b3</i> (9)                           | X-rays                                | Unpublished                                              | Non-sense           | Transition (A to G)/1bp   |
| 16 | BW-NIL( <i>vrs4.k</i> )               | MFB104                 | Bowman/ <i>Vrs1.b3</i> (11)                        | Gamma rays                            | Fukuyama <i>et al.</i> (12); Druka <i>et al.</i> 2011(4) | Non-sense           | Deletion (1bp)/72-72bp    |
| 17 | BW-NIL ( <i>mul1.a</i> )              | Montcalm               | Bowman/ <i>Vrs1.b3</i> (11)                        | Gamma rays                            | Kasha & Walker (13); Druka <i>et al.</i> 2011(4)         | Non-sense           | Deletion (11bp)/44-54bp   |
| 18 | <i>vrs4.1</i> ( <i>syn. Xc 41.5</i> ) | Pirolina               | Pirolina/ <i>Vrs1.b</i>                            | X-rays                                | Fukuyama <i>et al.</i> (12)                              | Non-sense           | Deletion (14bp)/528-546bp |
| 19 | MHOR318                               | Ackermann's<br>Donaria | Ackermann's<br>Donaria/ <i>Vrs1.b</i>              | X-rays                                | Unpublished                                              | Gene<br>deletion    | —                         |
| 20 | MHOR345                               | Heine's<br>Haisa       | Heine's Haisa<br>/ <i>Vrs1.b3</i> (14)             | X-rays                                | Unpublished                                              | Gene<br>deletion    | —                         |

\*Nucleotide positions of lesions in different *vrs4* mutant alleles with respect to reference sequence of *HvRA2*. See Fig. S5 for *HvRA2* reference sequence (GenBank accession KC854554) and mutations in different *vrs4* alleles mapped to the ORF.

\*\*Reference stating the allelic status at *Vrs1* locus.

**Table S5.** BAC clones sequenced in *Vrs4* gene region on 3HS

| <b>BAC Clone #</b> | <b>BAC Clone name</b> | <b>BAC length (Kb)</b> |
|--------------------|-----------------------|------------------------|
| 1                  | HVVMRXALLeA0166J14    | 81                     |
| 2                  | HVVMRXALLmA0525L04    | 155                    |
| 3                  | HVVMRXALLrA0402J12    | 157                    |
| 4                  | HVVMRXALLmA0524F02    | 116                    |
| 5                  | HVVMRX83khA0179C14    | 94                     |
| 6                  | HVVMRXALLhC0084K10    | 69                     |
| 7                  | HVVMRXALLrA0075M21    | 49                     |
| 8                  | HVVMRXALhLB0083N17    | 83                     |
| 9                  | HVVMRX83KhA0016A06    | 69                     |
| 10                 | HVVMRXALhLB0066O05    | 100                    |
| 11                 | HVVMRXALLrA0390E03    | 120                    |
| 12                 | HVVMRXALLeA0100K09    | 145                    |
| 13                 | HVVMRXALLeA0170A17    | 98                     |
| 14                 | HVVMRXALLmA0292B07    | 138                    |
| 15                 | HVVMRXALLeA0349L07    | 111                    |
| 16                 | HVVMRXALLeA0332L11    | 95                     |
| 17                 | HVVMRXALLeA0217N06    | 138                    |
| 18                 | HVVMRXALLmA0279J11    | 122                    |
| 19                 | HVVMRXALLmA0260B08    | 105                    |
| 20                 | HVVMRXALLmA0383N08    | 95                     |
| 21                 | HVVMRXALLeA0271J13    | 111                    |
| 22                 | HVVMRXALLeA0253H10    | 88                     |



**Table S6.** Monocot RAMOSA2 orthologs, RAMOSA2-LIKE sequences from eudicots and LBD proteins used for phylogenetic analysis.

| #  | Annotation                                                      | Query cover (%) | E-value | Max identity (%) | Accession/ Morex contig | Phylogenetic clade       |
|----|-----------------------------------------------------------------|-----------------|---------|------------------|-------------------------|--------------------------|
| 1  | RAMOSA2 [ <i>Hordeum vulgare</i> ]                              | 100             | 0.0     | 100              | ABC54561.1              | RAMOSA2 ortholog/homolog |
| 2  | RAMOSA2 [ <i>Triticum durum</i> ]                               | 100             | 5E-165  | 93               | ADJ67794.1              | RAMOSA2 ortholog/homolog |
| 3  | RAMOSA2 [ <i>Aegilops tauschii</i> ]                            | 100             | 2E-169  | 95               | EMT25999.1              | RAMOSA2 ortholog/homolog |
| 4  | RAMOSA2 [ <i>Oryza sativa Japonica Group</i> ]                  | 93              | 2E-125  | 79               | ABU44495.1              | RAMOSA2 ortholog/homolog |
| 5  | RAMOSA2 [ <i>Loudetia sp.</i> MCE-2012]                         | 94              | 2E-122  | 79               | AFJ42326.1              | RAMOSA2 ortholog/homolog |
| 6  | RAMOSA2 [ <i>Chrysopogon gryllus</i> ]                          | 93              | 6E-112  | 72               | AFJ42327.1              | RAMOSA2 ortholog/homolog |
| 7  | RAMOSA2 [ <i>Triticum aestivum</i> ]                            | 100             | 3E-158  | 94               | ABK79907.1              | RAMOSA2 ortholog/homolog |
| 8  | RAMOSA2 [ <i>Schizachyrium sanguineum var. hirtiflorum</i> ]    | 93              | 2E-101  | 69               | AFJ42332.1              | RAMOSA2 ortholog/homolog |
| 9  | RAMOSA2 [ <i>Sorghum bicolor</i> ]                              | 94              | 3E-104  | 69               | AFJ42334.1              | RAMOSA2 ortholog/homolog |
| 10 | RAMOSA2 [ <i>Andropogon hallii</i> ]                            | 94              | 1E-99   | 69               | AFJ42331.1              | RAMOSA2 ortholog/homolog |
| 11 | RAMOSA2 [ <i>Zea mays</i> ]                                     | 100             | 2E-112  | 73               | NP_001131918.1          | RAMOSA2 ortholog/homolog |
| 12 | RAMOSA2 [ <i>Phacelurus digitatus</i> ]                         | 100             | 1E-110  | 73               | AFJ42333.1              | RAMOSA2 ortholog/homolog |
| 13 | RAMOSA2 [ <i>Andropterum stolzii</i> ]                          | 94              | 8E-103  | 70               | AFJ42330.1              | RAMOSA2 ortholog/homolog |
| 14 | RAMOSA2 [ <i>Brachypodium distachyon</i> ]                      | 100             | 5E-117  | 77               | XP_003569245.1          | RAMOSA2 ortholog/homolog |
| 15 | RAMOSA2 [ <i>Brachypodium sylvaticum</i> ]                      | 100             | 1E-108  | 75               | CCF55439.1              | RAMOSA2 ortholog/homolog |
| 16 | RAMOSA2 [ <i>Cymbopogon flexuosus</i> ]                         | 100             | 2E-101  | 67               | AFJ42328.1              | RAMOSA2 ortholog/homolog |
| 17 | ELONGATED PETIOULE1 (ELP1) - [ <i>Glycine max</i> ]             | 48              | 2E-67   | 77               | AFK81066.1              | RAMOSA2 ortholog/homolog |
| 18 | LBD PROTEIN-LIKE [ <i>Glycine max</i> ]                         | 48              | 3E-67   | 77               | XP_003527004.1          | RAMOSA2 ortholog/homolog |
| 19 | ELONGATED PETIOULE2 - [ <i>Glycine max</i> ]                    | 48              | 7E-67   | 75               | XP_003523096.1          | RAMOSA2 ortholog/homolog |
| 20 | LBD PROTEIN-LIKE [ <i>Cicer arietinum</i> ]                     | 45              | 5E-67   | 81               | XP_004515877.1          | RAMOSA2 ortholog/homolog |
| 21 | LBD PROTEIN-LIKE [ <i>Glycine max</i> ]                         | 49              | 5E-66   | 77               | ACU23406.1              | RAMOSA2 ortholog/homolog |
| 22 | SLEEPLESS (SLP) - ortholog of ELP1 - [ <i>Lotus japonicus</i> ] | 63              | 5E-68   | 63               | AFK81064.1              | RAMOSA2 ortholog/homolog |
| 23 | ELONGATED PETIOULE1 (ELP1) - [ <i>Medicago truncatula</i> ]     | 45              | 4E-66   | 79               | AFK81063.1              | RAMOSA2 ortholog/homolog |
| 24 | LBD PROTEIN-LIKE [ <i>Cicer arietinum</i> ]                     | 45              | 4E-64   | 78               | XP_004501886.1          | RAMOSA2 ortholog/homolog |
| 25 | APULVINIC (APU) - ortholog of ELP1 - [ <i>Pisum sativum</i> ]   | 45              | 4E-65   | 78               | AFK81065.1              | RAMOSA2 ortholog/homolog |
| 26 | LBD PROTEIN-LIKE [ <i>Cucumis sativus</i> ]                     | 45              | 2E-67   | 81               | XP_004173060.1          | RAMOSA2 ortholog/homolog |
| 27 | LBD PROTEIN-LIKE [ <i>Ricinus communis</i> ]                    | 51              | 9E-69   | 78               | XP_002511341.1          | RAMOSA2 ortholog/homolog |
| 28 | LBD PROTEIN-LIKE [ <i>Populus trichocarpa</i> ]                 | 48              | 1E-68   | 81               | XP_002318660.1          | RAMOSA2 ortholog/homolog |
| 29 | LBD PROTEIN-LIKE [ <i>Theobroma cacao</i> ]                     | 48              | 2E-68   | 81               | EOY20851.1              | RAMOSA2 ortholog/homolog |
| 30 | LBD PROTEIN-LIKE [ <i>Prunus persica</i> ]                      | 47              | 3E-67   | 79               | EMJ12162.1              | RAMOSA2 ortholog/homolog |
| 31 | LBD PROTEIN-LIKE [ <i>Fragaria vesca subsp. vesca</i> ]         | 50              | 1E-67   | 75               | XP_004298984.1          | RAMOSA2 ortholog/homolog |
| 32 | LBD PROTEIN-LIKE [ <i>Solanum lycopersicum</i> ]                | 49              | 1E-66   | 77               | XP_004236250.1          | RAMOSA2 ortholog/homolog |
| 33 | LBD PROTEIN-LIKE [ <i>Capsella rubella</i> ]                    | 57              | 3E-63   | 67               | EOA15040.1              | RAMOSA2 ortholog/homolog |
| 34 | ASSYMETRIC LEAVES2-LIKE4 (ASL4) [ <i>Arabidopsis thaliana</i> ] | 43              | 4E-63   | 81               | NP_201114.1             | RAMOSA2 ortholog/homolog |
| 35 | LBD PROTEIN-LIKE [ <i>Solanum lycopersicum</i> ]                | 45              | 2E-61   | 74               | XP_004242158.1          | RAMOSA2 ortholog/homolog |
| 36 | LBD PROTEIN-LIKE [ <i>Vitis vinifera</i> ]                      | 46              | 2E-68   | 82               | XP_002281358.1          | RAMOSA2 ortholog/homolog |
| 37 | LBD PROTEIN25-LIKE [ <i>Cucumis sativus</i> ]                   | 45              | 2E-64   | 79               | XP_004169034.1          | RAMOSA2 ortholog/homolog |
| 38 | LBD PROTEIN25-LIKE [ <i>Cucumis sativus</i> ]                   | 49              | 5E-63   | 75               | XP_004156730.1          | RAMOSA2 ortholog/homolog |

|    |                                                          |    |       |    |                |                          |
|----|----------------------------------------------------------|----|-------|----|----------------|--------------------------|
| 39 | LBD PROTEIN-LIKE [ <i>Arabidopsis thaliana</i> ]         | 45 | 2E-57 | 74 | BAB02689.1     | RAMOSA2 ortholog/homolog |
| 40 | LBD PROTEIN-LIKE [ <i>Vitis vinifera</i> ]               | 45 | 3E-63 | 76 | XP_002273053.1 | RAMOSA2 ortholog/homolog |
| 41 | LBD PROTEIN-LIKE [ <i>Theobroma cacao</i> ]              | 45 | 2E-66 | 79 | EOY02489.1     | RAMOSA2 ortholog/homolog |
| 42 | LBD PROTEIN-LIKE [ <i>Prunus persica</i> ]               | 45 | 6E-63 | 80 | EMJ18120.1     | RAMOSA2 ortholog/homolog |
| 43 | LBD PROTEIN-LIKE [ <i>Ricinus communis</i> ]             | 46 | 1E-64 | 78 | XP_002521459.1 | RAMOSA2 ortholog/homolog |
| 44 | LBD PROTEIN-LIKE [ <i>Populus trichocarpa</i> ]          | 45 | 2E-65 | 79 | XP_002300051.1 | RAMOSA2 ortholog/homolog |
| 45 | LBD PROTEIN25-LIKE [ <i>Glycine max</i> ]                | 46 | 1E-62 | 75 | XP_003554815.1 | RAMOSA2 ortholog/homolog |
| 46 | LBD PROTEIN25-LIKE [ <i>Glycine max</i> ]                | 45 | 2E-65 | 79 | XP_003548568.1 | RAMOSA2 ortholog/homolog |
| 47 | LBD PROTEIN25 [ <i>Glycine max</i> ]                     | 45 | 6E-65 | 78 | XP_003553820.1 | RAMOSA2 ortholog/homolog |
| 48 | LBD PROTEIN-LIKE [ <i>Cucumis sativus</i> ]              | 47 | 5E-61 | 74 | XP_004157828.1 | RAMOSA2 ortholog/homolog |
| 49 | LBD PROTEIN-LIKE [ <i>Prunus persica</i> ]               | 45 | 7E-48 | 66 | EMJ13351.1     | LBD protein (CLASS I)    |
| 50 | LBD PROTEIN4-LIKE [ <i>Fragaria vesca subsp. vesca</i> ] | 45 | 4E-49 | 66 | XP_004293726.1 | LBD protein (CLASS I)    |
| 51 | LBD PROTEIN-LIKE [ <i>Populus trichocarpa</i> ]          | 45 | 2E-47 | 65 | XP_002304584.1 | LBD protein (CLASS I)    |
| 52 | LBD PROTEIN4 isoform 1 [ <i>Theobroma cacao</i> ]        | 45 | 2E-48 | 66 | EOY27472.1     | LBD protein (CLASS I)    |
| 53 | LBD PROTEIN4 [ <i>Vitis vinifera</i> ]                   | 45 | 8E-48 | 64 | XP_002270650.1 | LBD protein (CLASS I)    |
| 54 | LBD PROTEIN4-LIKE [ <i>Cicer arietinum</i> ]             | 45 | 2E-47 | 64 | XP_004505337.1 | LBD protein (CLASS I)    |
| 55 | LBD PROTEIN-LIKE - LOC100790989 [ <i>Glycine max</i> ]   | 47 | 6E-48 | 60 | NP_001241363.1 | LBD protein (CLASS I)    |
| 56 | LBD PROTEIN4-LIKE [ <i>Solanum lycopersicum</i> ]        | 45 | 1E-48 | 65 | XP_004250781.1 | LBD protein (CLASS I)    |
| 57 | LBD PROTEIN-LIKE [ <i>Ricinus communis</i> ]             | 50 | 3E-50 | 60 | XP_002513395.1 | LBD protein (CLASS I)    |
| 58 | LBD PROTEIN4 [ <i>Theobroma cacao</i> ]                  | 46 | 2E-48 | 64 | EOY13865.1     | LBD protein (CLASS I)    |
| 59 | LBD PROTEIN-LIKE [ <i>Medicago truncatula</i> ]          | 45 | 3E-47 | 64 | XP_003616690.1 | LBD protein (CLASS I)    |
| 60 | LBD PROTEIN-LIKE [ <i>Theobroma cacao</i> ]              | 47 | 3E-49 | 63 | EOY34594.1     | LBD protein (CLASS I)    |
| 61 | LBD PROTEIN-LIKE [ <i>Vitis vinifera</i> ]               | 47 | 4E-48 | 64 | CAN68873.1     | LBD protein (CLASS I)    |
| 62 | LBD PROTEIN-LIKE [ <i>Prunus persica</i> ]               | 47 | 4E-48 | 64 | EMJ07197.1     | LBD protein (CLASS I)    |
| 63 | LBD PROTEIN6-like [ <i>Cucumis sativus</i> ]             | 50 | 8E-55 | 65 | XP_004152887.1 | LBD protein (CLASS I)    |
| 64 | LBD PROTEIN6-like [ <i>Glycine max</i> ]                 | 61 | 6E-48 | 57 | XP_003545810.1 | LBD protein (CLASS I)    |
| 65 | LBD PROTEIN-LIKE [ <i>Capsella rubella</i> ]             | 51 | 3E-47 | 64 | EOA35742.1     | LBD protein (CLASS I)    |
| 66 | LBD PROTEIN-LIKE [ <i>Populus trichocarpa</i> ]          | 59 | 5E-49 | 58 | XP_002307250.1 | LBD protein (CLASS I)    |
| 67 | LBD PROTEIN36-like [ <i>Cucumis sativus</i> ]            | 51 | 1E-47 | 62 | XP_004148465.1 | LBD protein (CLASS I)    |
| 68 | LBD PROTEIN-LIKE [ <i>Prunus persica</i> ]               | 53 | 1E-47 | 61 | EMJ04878.1     | LBD protein (CLASS I)    |
| 69 | LBD PROTEIN1-LIKE [ <i>Hordeum vulgare</i> ]             | —  | 8E-57 | —  | Ctg135924_5HL  | LBD protein (CLASS I)    |
| 70 | LBD PROTEIN15-LIKE [ <i>Hordeum vulgare</i> ]            | —  | 3E-23 | —  | Ctg1572307_3HL | LBD protein (CLASS I)    |
| 71 | LBD PROTEIN1-LIKE [ <i>Hordeum vulgare</i> ]             | —  | 9E-18 | —  | Ctg62778_4HL   | LBD protein (CLASS I)    |
| 72 | LBD PROTEIN11-LIKE [ <i>Hordeum vulgare</i> ]            | —  | 2E-52 | —  | Ctg54974_1H    | LBD protein (CLASS I)    |
| 73 | LBD PROTEIN18-LIKE [ <i>Hordeum vulgare</i> ]            | —  | 9E-12 | —  | Ctg1591863_7HS | LBD protein (CLASS I)    |
| 74 | LBD PROTEIN16-LIKE [ <i>Hordeum vulgare</i> ]            | —  | 2E-27 | —  | Ctg46032_6HL   | LBD protein (CLASS I)    |
| 75 | LBD PROTEIN24-LIKE [ <i>Hordeum vulgare</i> ]            | —  | 9E-18 | —  | Ctg47723_4HL   | LBD protein (CLASS I)    |
| 76 | LBD PROTEIN6-LIKE [ <i>Hordeum vulgare</i> ]             | —  | 2E-76 | —  | Ctg61827_3HL   | LBD protein (CLASS I)    |
| 77 | LBD PROTEIN6-LIKE [ <i>Hordeum vulgare</i> ]             | —  | 3E-81 | —  | Ctg45166_1H    | LBD protein (CLASS I)    |
| 78 | LBD PROTEIN6-LIKE [ <i>Hordeum vulgare</i> ]             | —  | 2E-76 | —  | Ctg51474_4HS   | LBD protein (CLASS I)    |
| 79 | LBD PROTEIN7-LIKE [ <i>Hordeum vulgare</i> ]             | —  | 4E-09 | —  | Ctg98873_3HL   | LBD protein (CLASS I)    |
| 80 | LBD PROTEIN-LIKE [ <i>Hordeum vulgare</i> ]              | —  | 4E-10 | —  | Ctg38897_5HL   | LBD protein (CLASS I)    |

|    |                                                         |   |   |              |                        |
|----|---------------------------------------------------------|---|---|--------------|------------------------|
| 81 | LBD PROTEIN41-LIKE; Class II [ <i>Hordeum vulgare</i> ] | — | — | Ctg42541_2HL | LBD protein (CLASS II) |
| 82 | LBD PROTEIN38-LIKE; Class II [ <i>Hordeum vulgare</i> ] | — | — | Ctg36895     | LBD protein (CLASS II) |
| 83 | LBD PROTEIN39-LIKE; Class II [ <i>Hordeum vulgare</i> ] | — | — | Ctg1561909   | LBD protein (CLASS II) |
| 84 | LBD PROTEIN41-LIKE; Class II [ <i>Hordeum vulgare</i> ] | — | — | Ctg50476_4HL | LBD protein (CLASS II) |

## References

1. Chen X, *et al.* (2005) Mutation of the *RESURRECTION1* locus of Arabidopsis reveals an association of cuticular wax with embryo development. *Plant Physiol.* 139(2):909-919.
2. Forster BP, *et al.* (2007) The barley phytomer. *Ann. Bot.* 100(4):725-733.
3. Fukuyama T, Takahashi R, & Hayashi J (1982) Genetic studies on the induced six-rowed mutants in barley. *Ber. Ohara Inst. landw. Biol., Okayama Univ.* 18:99-113.
4. Druka A, *et al.* (2011) Genetic dissection of barley morphology and development. *Plant Physiol.* 155(2):617-627.
5. Doyle JJ & Doyle JL (1990) Isolation of plant DNA from fresh tissue. *Focus* 12:13-15.
6. Komatsuda T, Nakamura I, Takaiwa F, & Oka S (1998) Development of STS markers closely linked to the *vrs1* locus in barley, *Hordeum vulgare*. *Genome* 41(5):680-685.
7. Thompson JD, Higgins DG, & Gibson TJ (1994) CLUSTAL W: improving the sensitivity of progressive multiple sequence alignment through sequence weighting, position-specific gap penalties and weight matrix choice. *Nucleic Acids Res.* 22(22):4673-4680.
8. Shuai B, Reynaga-Pena CG, & Springer PS (2002) The *LATERAL ORGAN BOUNDARIES* gene defines a novel, plant-specific gene family. *Plant Physiol.* 129(2):747-761.
9. Komatsuda T, *et al.* (2007) Six-rowed barley originated from a mutation in a homeodomain-leucine zipper I-class homeobox gene. *Proc. Natl. Acad. Sci. USA* 104(4):1424-1429.
10. Lundqvist U (1991) Coordinator's report: Ear morphology genes. *Barley Genetics Newsletter* 20:85.
11. Cuesta-Marcos A, *et al.* (2010) Genome-wide SNPs and re-sequencing of growth habit and inflorescence genes in barley: implications for association mapping in germplasm arrays varying in size and structure. *BMC Genomics* 11:707.
12. Fukuyama T, Hayashi J, & Takahashi R (1975) Genetic and linkage studies of five types of induced six-row mutants. *Barley Genetics Newsletter* 5:12-13.
13. Kasha KJ & Walker GWR (1960) Several recent barley mutants and their linkages. *Can. J. Genet. Cytol.* 2:397-415.
14. Ramsay L, *et al.* (2011) *INTERMEDIUM-C*, a modifier of lateral spikelet fertility in barley, is an ortholog of the maize domestication gene *TEOSINTE BRANCHED1*. *Nat. Genet.* 43(2):169-172.
